# Supplementary material for: Pyrrolocytosine–pyrene conjugates as fluorescent and CD probes for the fine sensing of ds-polynucleotide secondary structure and specific recognition of poly G
Source: Royal Society of Chemistry journal article supplement (doi:10.1039/c8nj05286g), 2019-01-01
Supplement: c8nj05286g1.pdf [file c8nj05286g1.pdf]

## Supplementary Data

### Pyrrolocytosine-pyrene conjugates as fluorescent and CD probes for a fine sensing of ds-DNA/RNA secondary structure and specific recognition of poly G

Željka Ban,<sup>1</sup> Biserka Žinić,<sup>1</sup> Marija Matković,<sup>1</sup> Ana Tomašić Paić<sup>1</sup>, Ivo Crnolatac<sup>1</sup> and Ivo Piantanida<sup>1\*</sup>

<sup>1</sup> Division of organic chemistry and biochemistry, Ruđer Bošković Institute, Bijenička cesta 54, 10000 Zagreb,

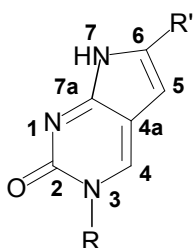

**Figure S1.** The compound 3*H*-pyrrolo[2,3-*d*] pyrimidin-2(7*H*)-one (pyrrolocytosine) is abbreviated as Pyrr-C.

#### Physico-chemical properties of 2-4 aqueous solutions:

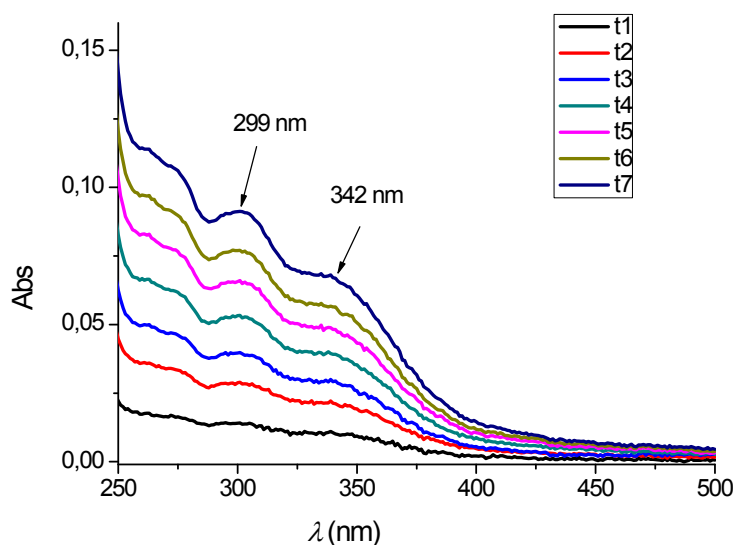

**Figure S2.** Concentration dependence of the UV/Vis spectrum of **1** (concentration range from  $3 \times 10^{-6}$ –  $2 \times 10^{-5}$  mol/L) in buffered solution pH 7,  $I = 0.05$  mol/L.

a)

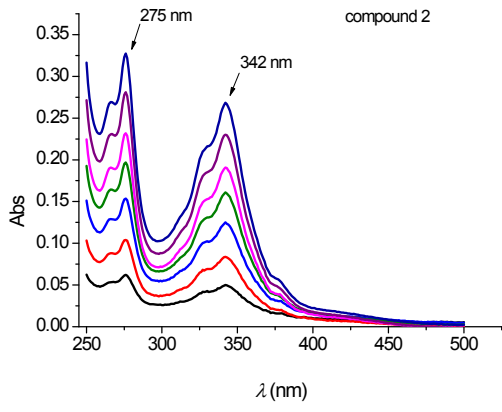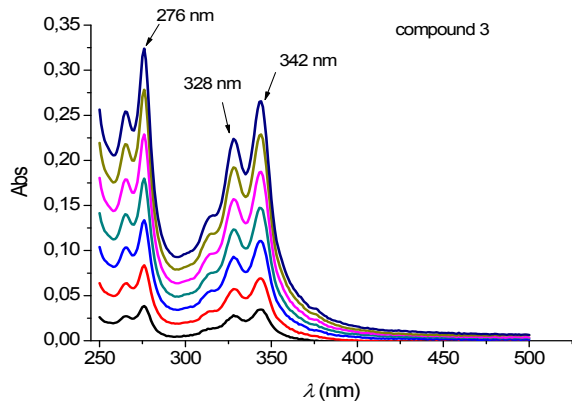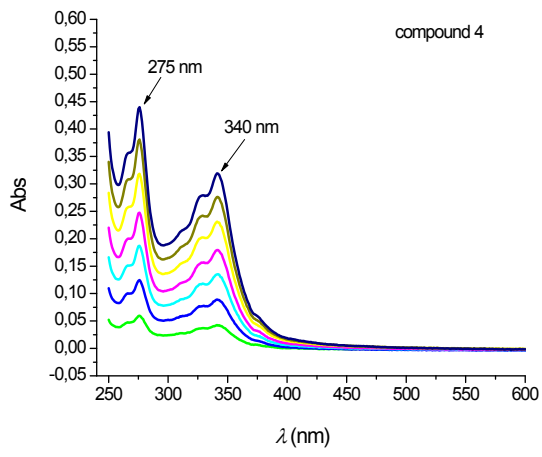

b)

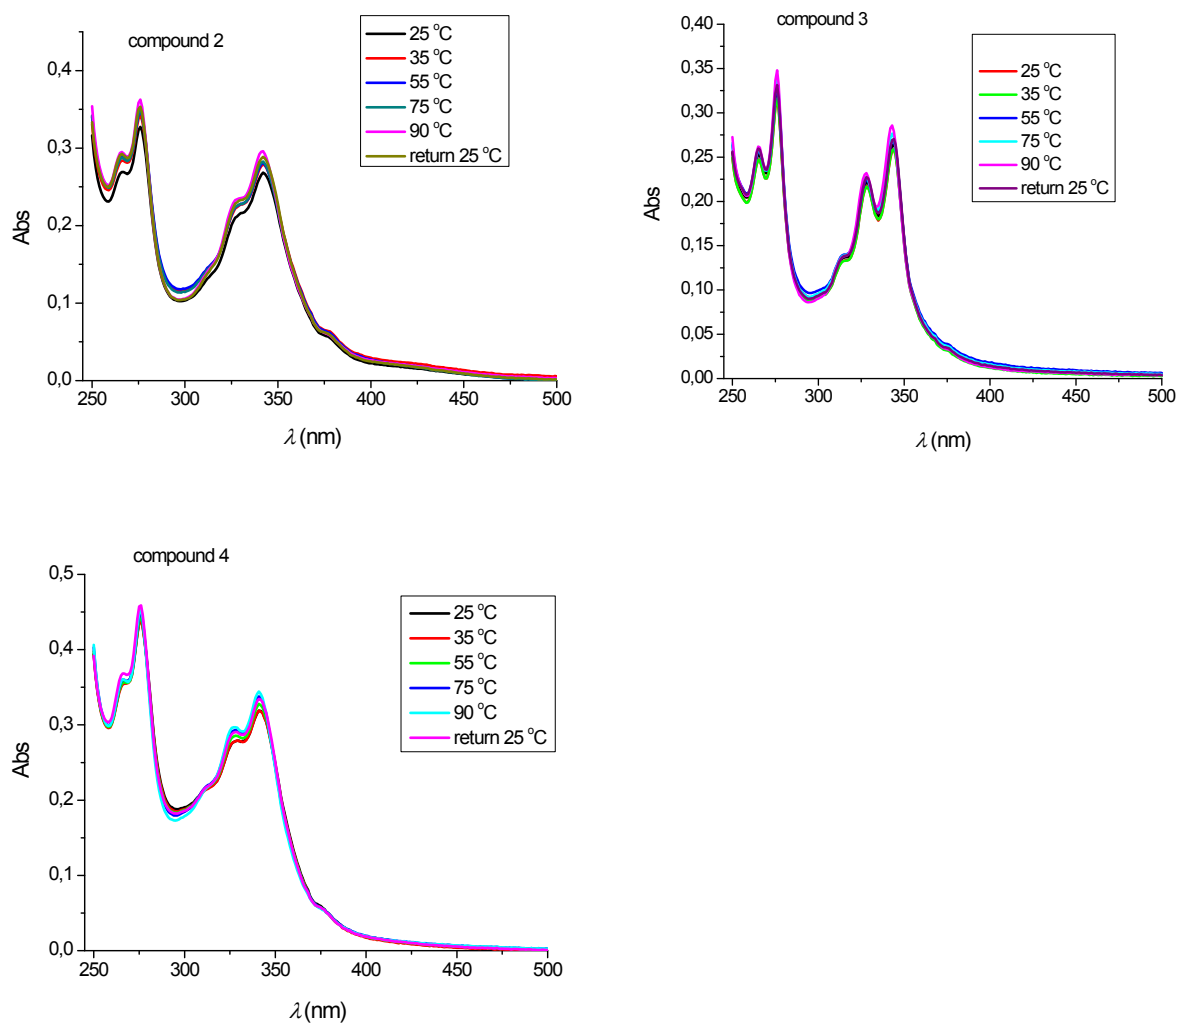

**Figure S3.** a) Concentration dependence of the UV/Vis spectrum of **2** - **4** (concentration range from  $3 \times 10^{-6}$  –  $2 \times 10^{-5}$  mol/L) in buffered solution (pH 7.0,  $I = 0.05$  mol/L); b) temperature dependence of the UV/Vis spectrum of **2** - **4** ( $c = 2 \times 10^{-5}$  mol/L) in buffered solution (pH 7.0,  $I = 0.05$  mol/L).

**Table S1.** Electronic absorbance data of **1** - **4**

| Compound | $\lambda_{\max}/\text{nm}$ | $\epsilon \times 10^3/\text{Lmol}^{-1}\text{cm}^{-1}$ |
|----------|----------------------------|-------------------------------------------------------|
| <b>1</b> | 299                        | $4.3 \pm 0.1$                                         |
|          | 342                        | $3.1 \pm 0.1$                                         |
| <b>2</b> | 275                        | $12.2 \pm 0.2$                                        |
|          | 342                        | $14.5 \pm 0.2$                                        |
| <b>3</b> | 276                        | $16.1 \pm 0.9$                                        |
|          | 328                        | $11 \pm 0.1$                                          |
|          | 342                        | $13.1 \pm 0.1$                                        |
| <b>4</b> | 275                        | $21.3 \pm 0.2$                                        |
|          | 340                        | $15.4 \pm 0.1$                                        |

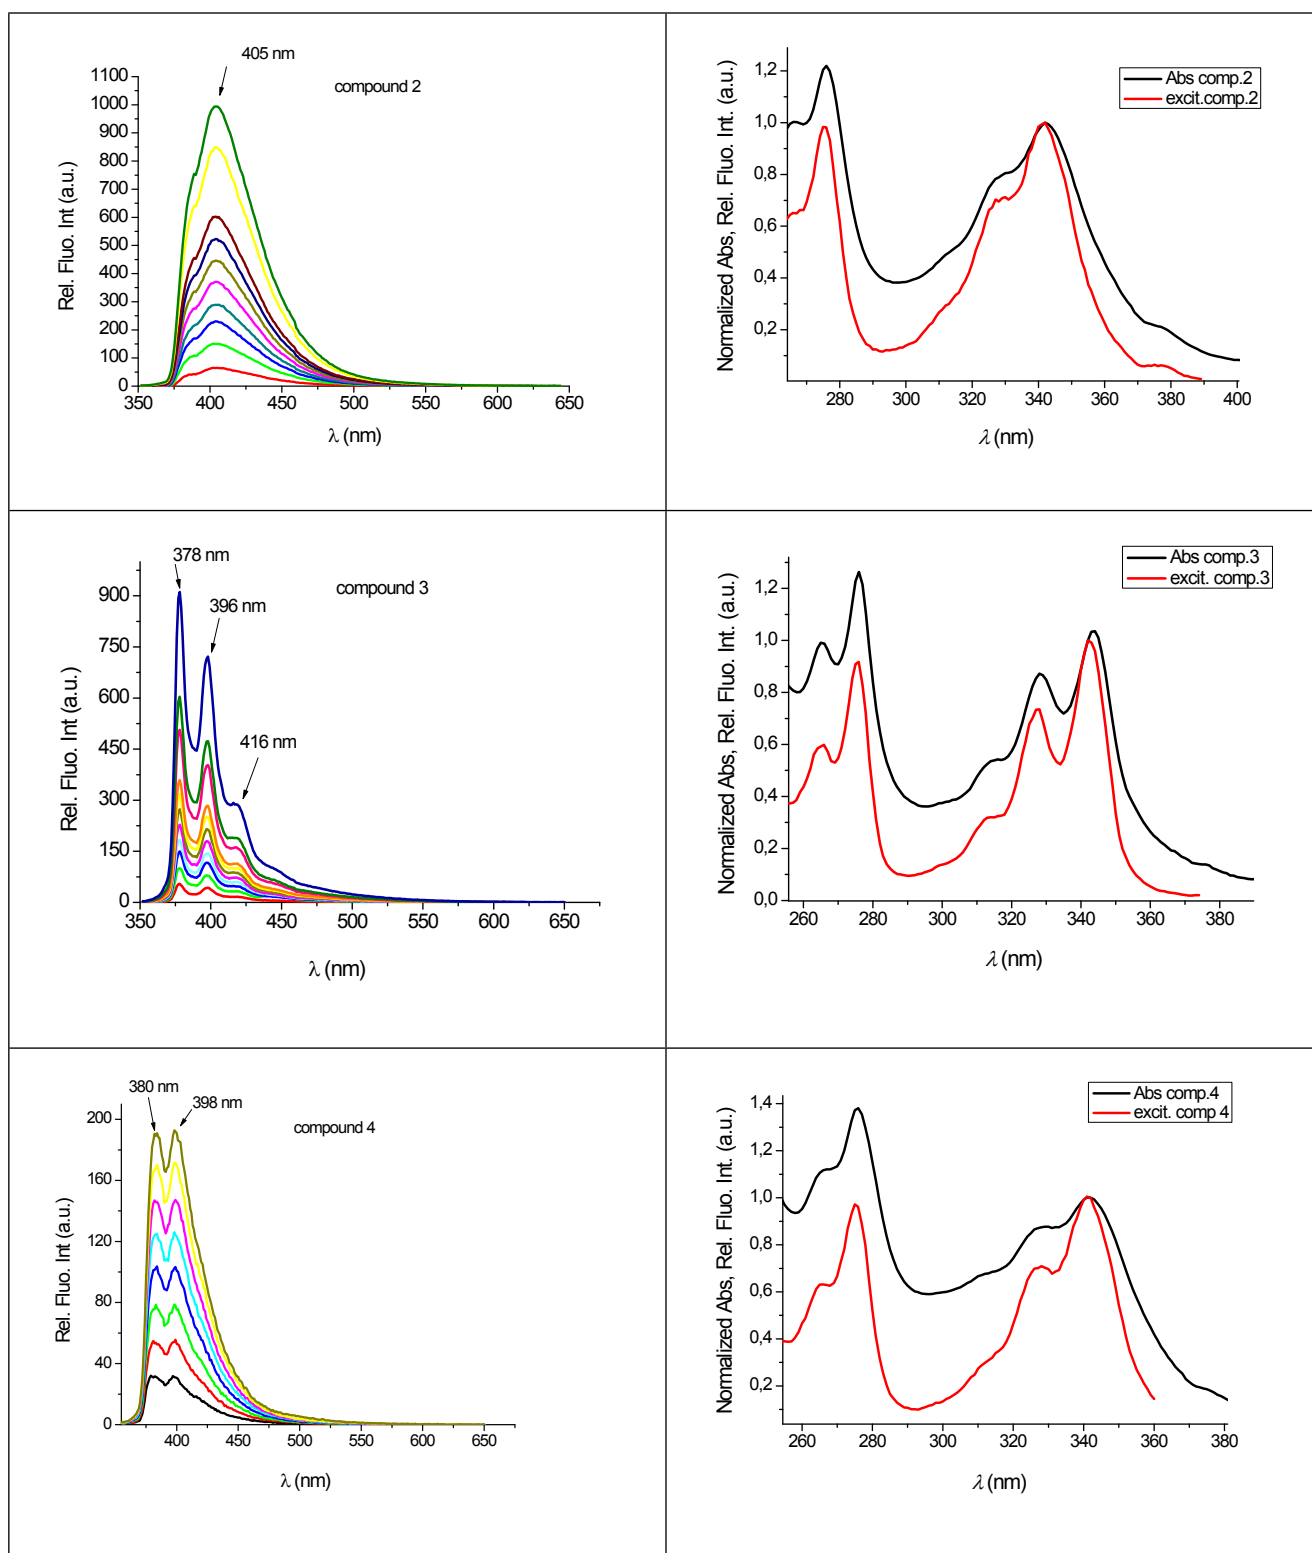

**Figure S4.** LEFT: Fluorescence spectra changes of **2 - 4** at different concentrations ( $1 \times 10^{-7}$ – $1 \times 10^{-6}$  mol/L); **RIGHT:** Comparison of normalized absorption ( $c = 2 \times 10^{-5}$  mol/L) and excitation spectra ( $c = 1 \times 10^{-6}$  mol/L;  $\lambda_{\text{em}} = 400$  nm) of **2 - 4**. Done at pH = 7.0, sodium cacodylate buffer,  $I = 0.05$  mol/L.

## DNA, RNA binding studies:

**Table S2.** Structural properties of studied DNA and RNA.<sup>1</sup>

| Structure type                | Groove width |       | Groove depth |       |
|-------------------------------|--------------|-------|--------------|-------|
|                               | major        | minor | major        | minor |
| A <sub>n</sub> U <sub>n</sub> | 3.8          | 10.9  | -            | -     |
| <sup>a</sup> B-DNA            | 11.7         | 5.7   | 8.5          | 7.5   |
| (dGdC) <sub>n</sub>           | 13.5         | 9.5   | 10.0         | 7.2   |
| (dAdT) <sub>n</sub>           | 11.2         | 6.3   | -            | -     |

<sup>a</sup>Calf Thymus (ct)-DNA

## Thermal denaturation data:

Here shown are normalized thermal denaturation data, focused on inflection point. All experiments are done at least twice, and for more accurate reading of thermal denaturation points 1<sup>st</sup> derivation of melting curves was used (maximum at inflection point of the curve).

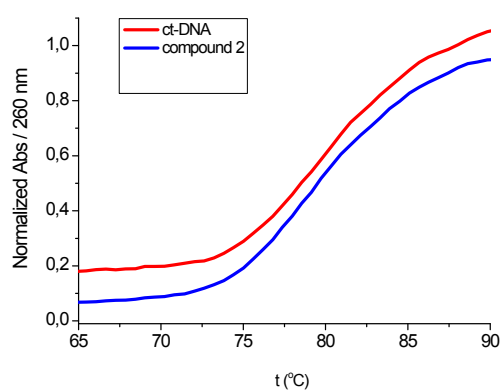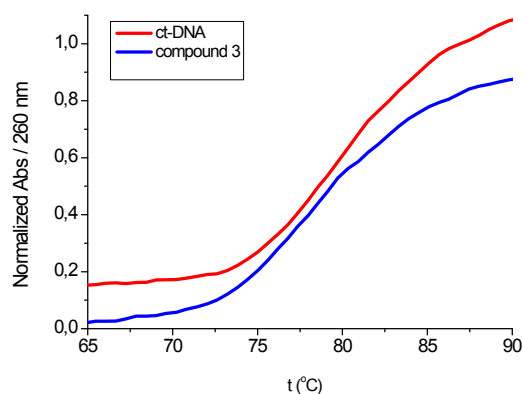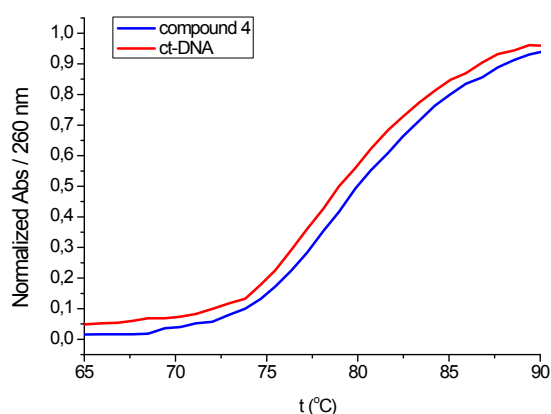

**Figure S5.** Normalized thermal denaturation spectra of ctDNA upon addition of **2** - **4** ( $r = 0.3[\text{compound}]/[\text{polynucleotide}]$ ) at pH 7.0 (buffer sodium cacodylate,  $I = 0.05 \text{ mol/L}$ ).

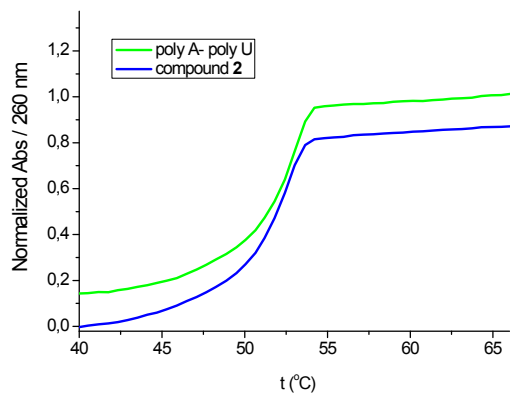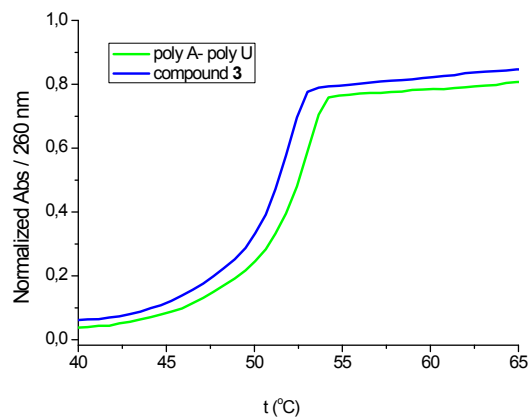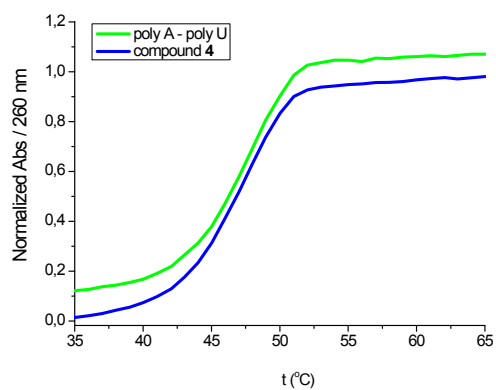

**Figure S6.** Normalized thermal denaturation spectra of **poly A – poly U**, upon addition of **2 - 4** ( $r = 0.3[\text{compound}]/[\text{polynucleotide}]$ ) at pH 7.0 (buffer sodium cacodylate,  $I = 0.05 \text{ mol/L}$ ).

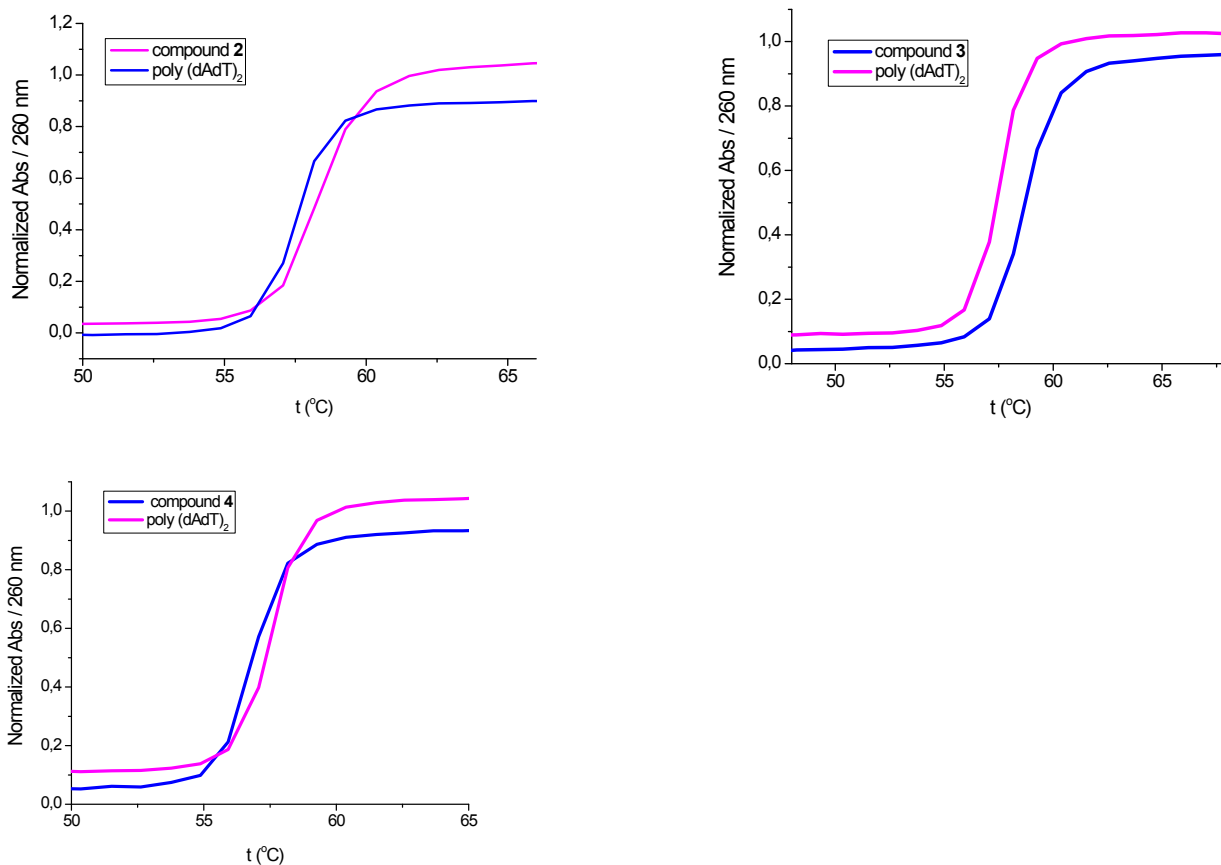

**Figure S7.** Normalized thermal denaturation spectra of **poly (dAdT)<sub>2</sub>**, upon addition of **2 - 4** ( $r = 0.3[\text{compound}] / [\text{polynucleotide}]$ ) at pH 7.0 (buffer sodium cacodylate,  $I = 0.05 \text{ mol/L}$ ).

**Table S3.** The  $^a\Delta T_m$  values ( $^{\circ}\text{C}$ ) of studied ds- polynucleotides upon addition of ratio  $^b r = 0.3$  of **2-4** at pH 7.0 (sodium cacodylate buffer,  $I = 0.05 \text{ mol/L}$ ).

|          | ctDNA | poly A – poly U | poly (dAdT) <sub>2</sub> |
|----------|-------|-----------------|--------------------------|
| <b>2</b> | 0.8   | -0.4            | 1.0                      |
| <b>3</b> | -0.1  | -0.7            | 1.1                      |
| <b>4</b> | 0.9   | 0.5             | 1.0                      |

<sup>a</sup> Error in  $\Delta T_m : \pm 0.5^{\circ}\text{C}$ ;

<sup>b</sup>  $r = [\text{compound}] / [\text{polynucleotide}]$ ;

## Fluorimetric titrations of compounds 1 -4 with ds-DNA/RNA:

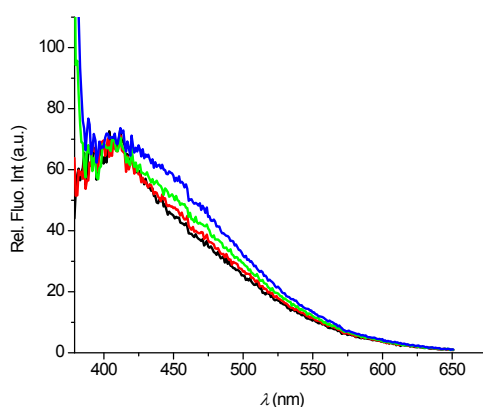

**Figure S8.** Fluorescence spectra changes of **1** ( $c = 2 \times 10^{-6}$  mol/L) upon addition of **ct-DNA** (concentration range from  $2 \times 10^{-5}$ – $2 \times 10^{-4}$  mol/L;  $\lambda_{\text{exc}} = 355$  nm) at pH 7.0, sodium cacodylate buffer,  $I = 0.05$  mol/L.

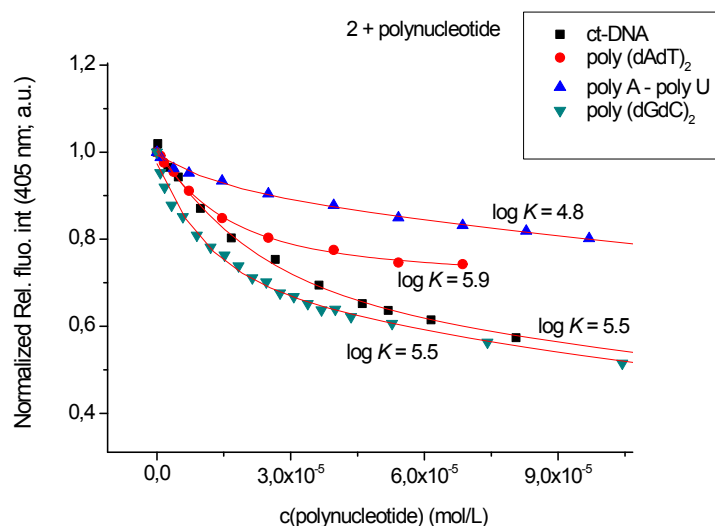

**Figure S9.** Fluorimetric titrations normalized to starting fluorescence intensity of **2** ( $c = 4 \times 10^{-7}$  mol/L;  $\lambda_{\text{exc}} = 342$  nm,  $\lambda_{\text{em}} = 405$  nm) with all ds-polynucleotides. Done at pH = 7.0, sodium cacodylate buffer,  $I = 0.05$  mol/L.



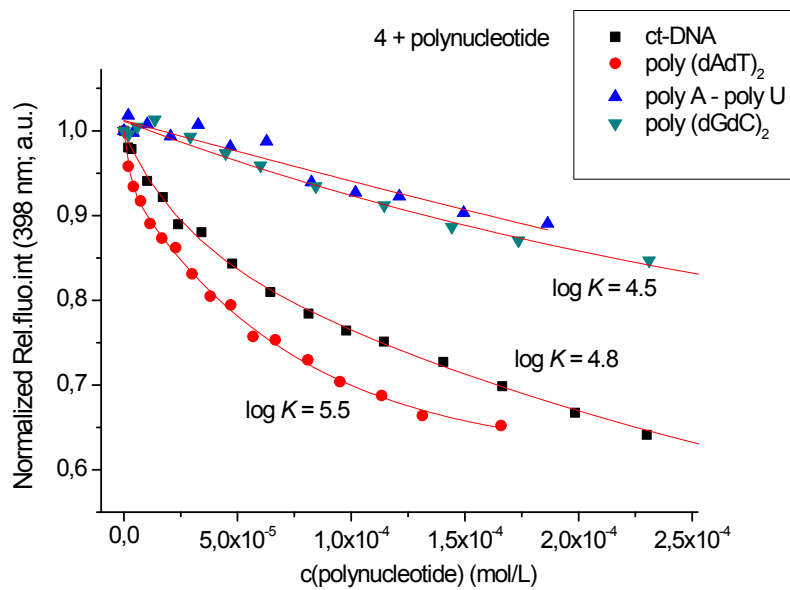

**Figure S10.** Fluorimetric titrations normalized to starting fluorescence intensity of **4** ( $c = 1 \times 10^{-6}$  mol/L;  $\lambda_{\text{exc}} = 340$  nm) with all ds-polynucleotides. Done at pH = 7.0, sodium cacodylate buffer, I = 0.05 mol/L.

## Fluorimetric titrations of compounds 1 -4 with ss-RNA:

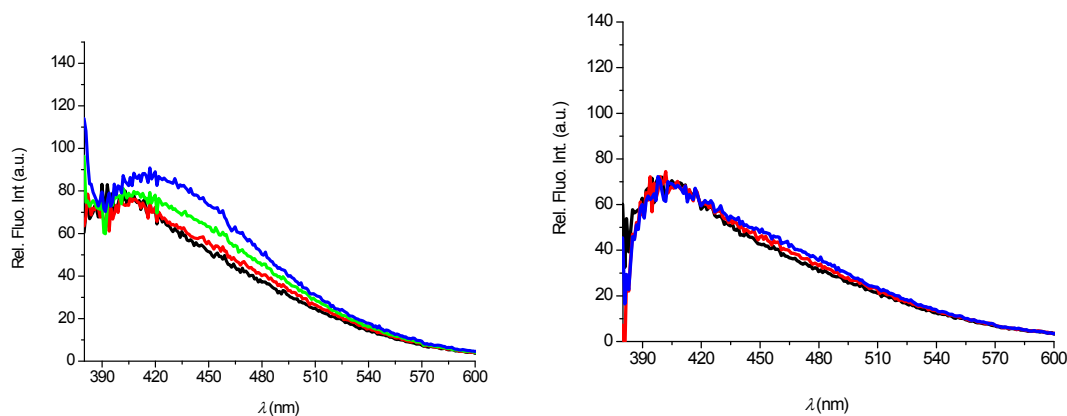

**Figure S11.** Fluorescence spectra changes of **1** ( $c=2\times 10^{-6}$  mol/L;  $\lambda_{exc}=355$  nm) upon addition of **poly A** (LEFT) and **poly C** (RIGHT) at pH 7.0, sodium cacodylate buffer,  $I=0.05$  mol/L.

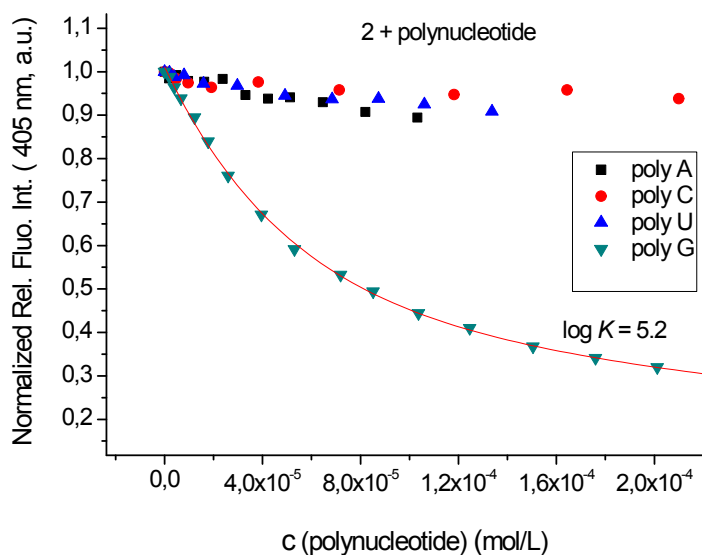

**Figure S12.** Fluorimetric titrations normalized to starting fluorescence intensity of **2** ( $c = 1\times 10^{-6}$  mol/L,  $\lambda_{exc} = 342$  nm,  $\lambda_{em} = 405$  nm) upon titration with all ss-polynucleotides (sodium cacodylate buffer, pH = 7.0,  $I = 0.05$  mol/L).

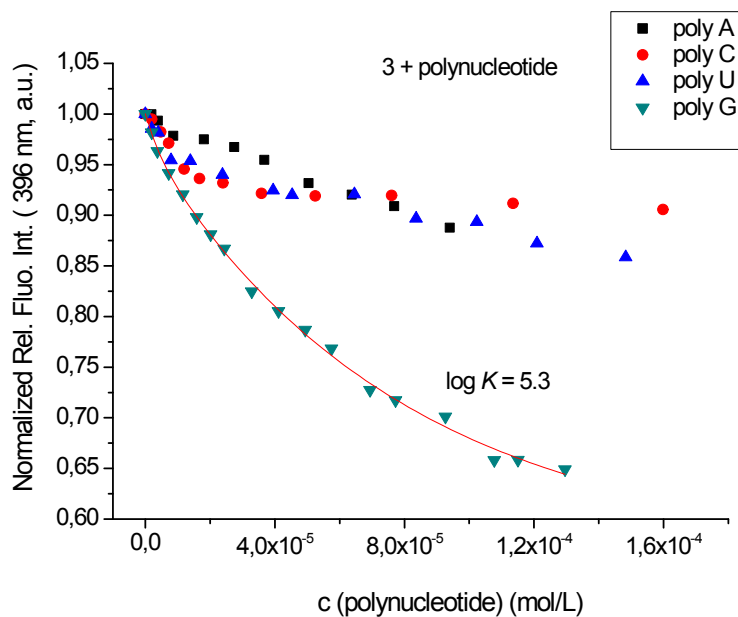

**Figure S13.** Fluorimetric titrations normalized to starting fluorescence intensity of **3** ( $c = 1 \times 10^{-6}$  mol/L;  $\lambda_{\text{exc}} = 342$  nm,  $\lambda_{\text{em}} = 396$  nm) upon titration with all ss-polynucleotides. Done at pH = 7.0, sodium cacodylate buffer,  $I = 0.05$  mol/L.

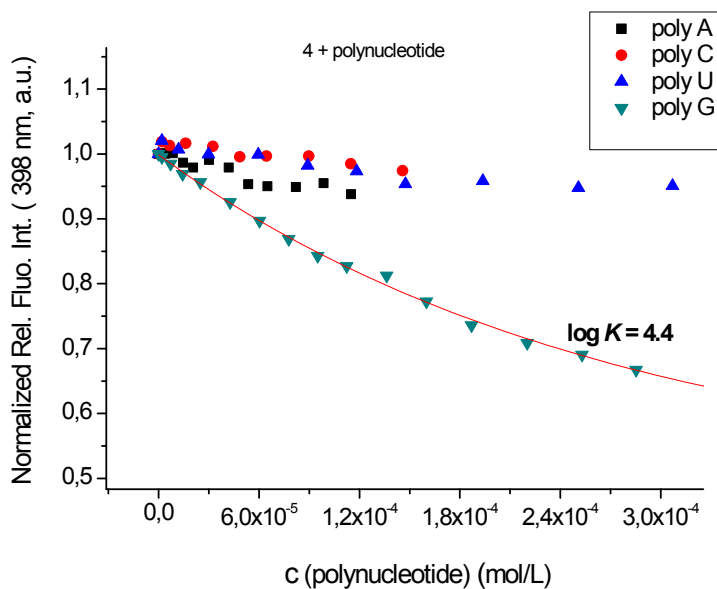

**Figure S14.** Fluorimetric titrations normalized to starting fluorescence intensity of **4** ( $c = 1 \times 10^{-6}$  mol/L;  $\lambda_{\text{exc}} = 340$  nm,  $\lambda_{\text{em}} = 398$  nm) upon titration with all ss-polynucleotides. Done at pH = 7.0, sodium cacodylate buffer,  $I = 0.05$  mol/L.

## Circular dichroism (CD) experiments

So far, non-covalent interactions at 25 °C were studied by monitoring the spectroscopic properties of studied compound upon addition of the polynucleotides. In order to get insight into the changes of polynucleotide properties induced by small molecule binding, we have chosen CD spectroscopy as a highly sensitive method toward conformational changes in the secondary structure of polynucleotides.<sup>2</sup> In addition, achiral small molecules can eventually acquire induced CD spectrum (ICD) upon binding to polynucleotides, which could give useful information about modes of interaction.<sup>2</sup>

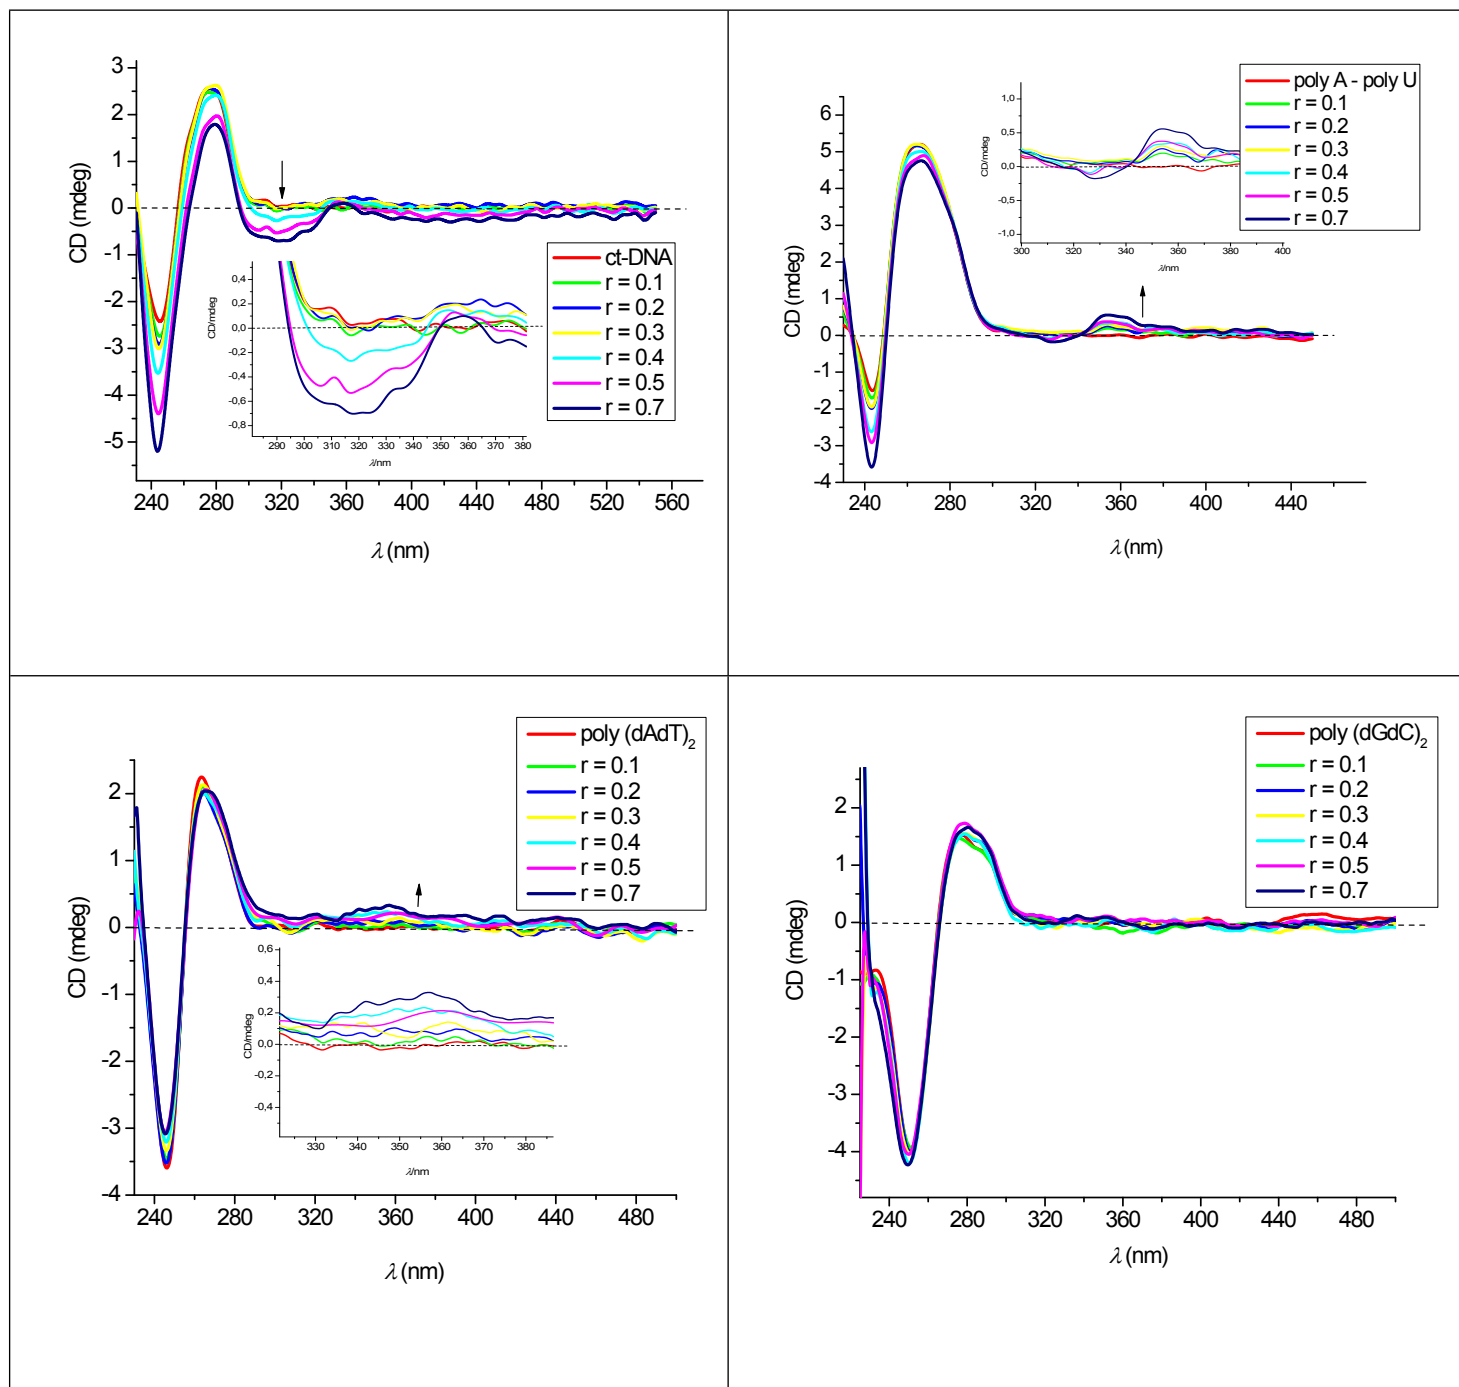

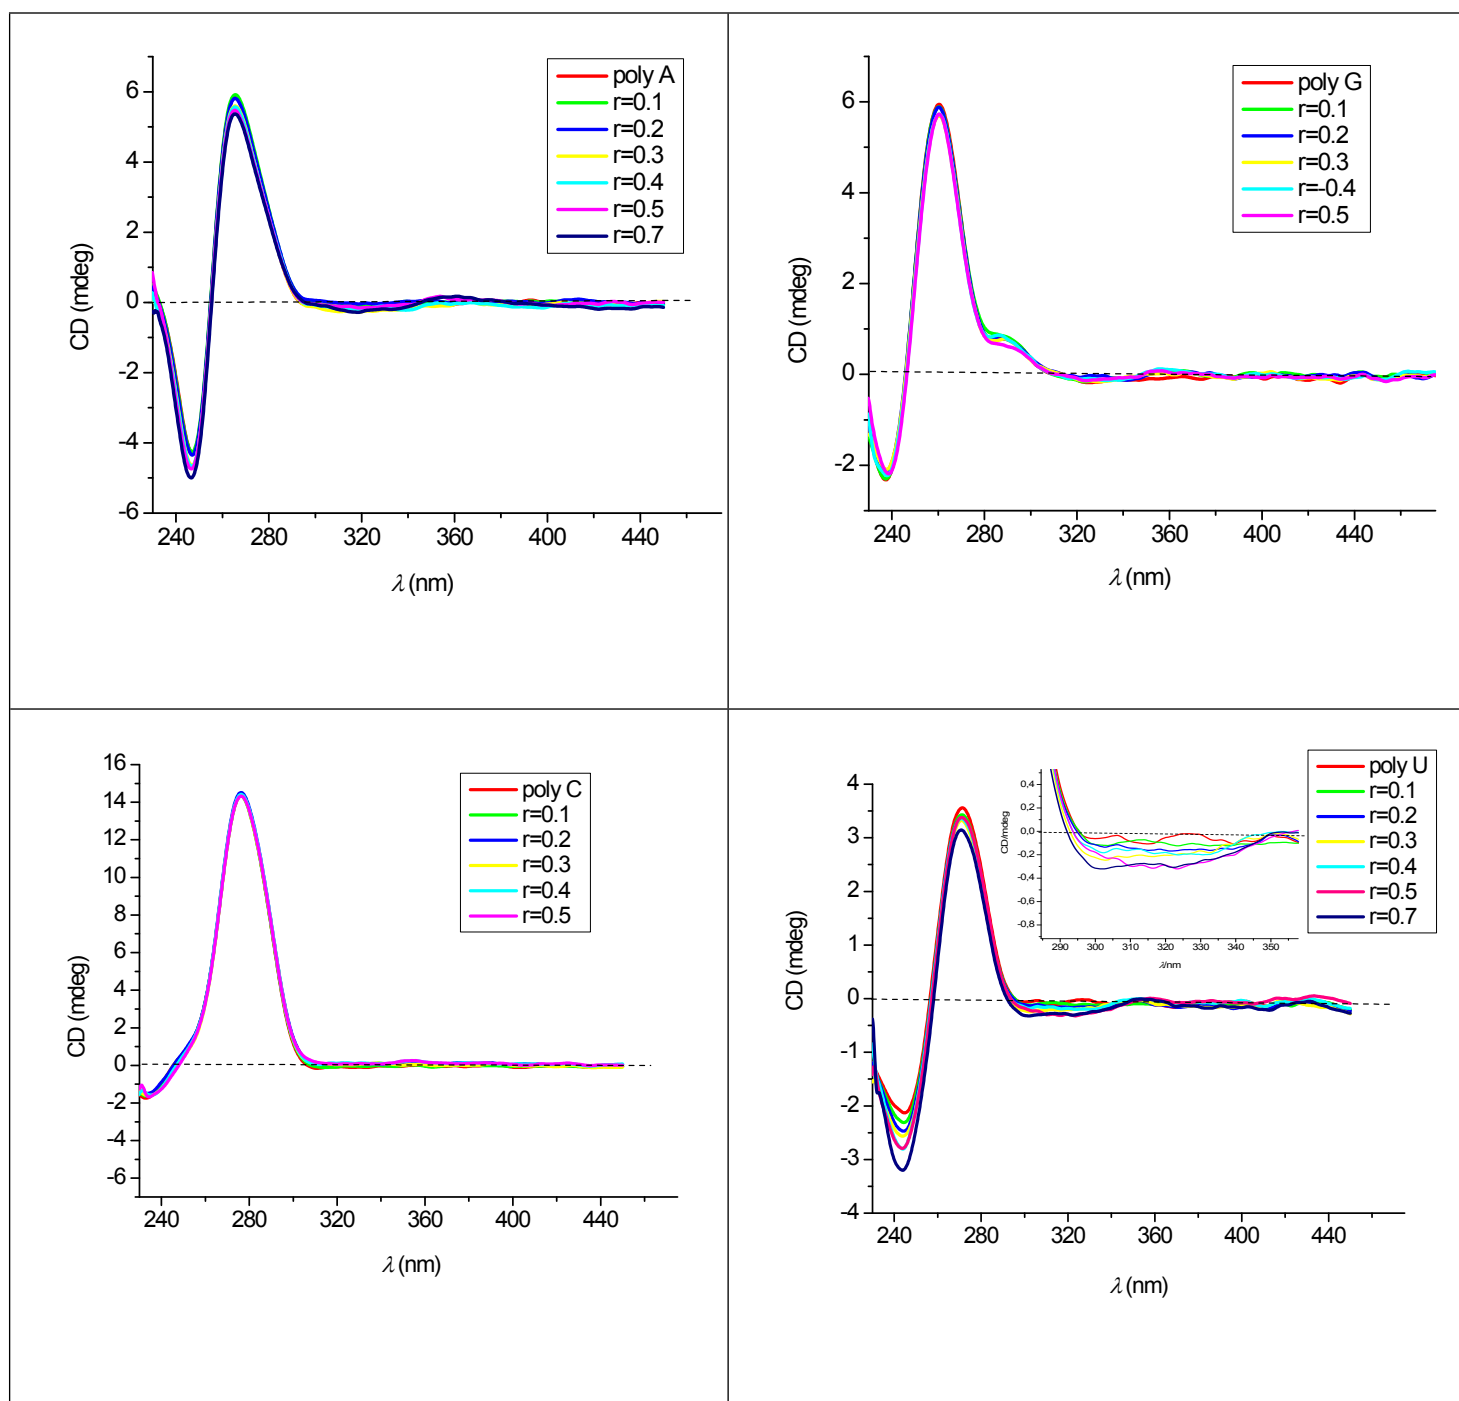

**Figure S15.** CD titration of **ct-DNA**, **poly A – poly U**, **poly (dAdT)<sub>2</sub>**, **poly (dGdC)<sub>2</sub>**, **poly A**, **poly G**, **poly C** and **poly U** (all DNA and RNA  $c = 2 \times 10^{-5}$  mol/L) with **2** at molar ratios  $r$  [2] / [polynucleotide] = 0.1 - 0.5 (0.7). Done at pH 7, sodium cacodylate buffer,  $I = 0.05$  mol/L.

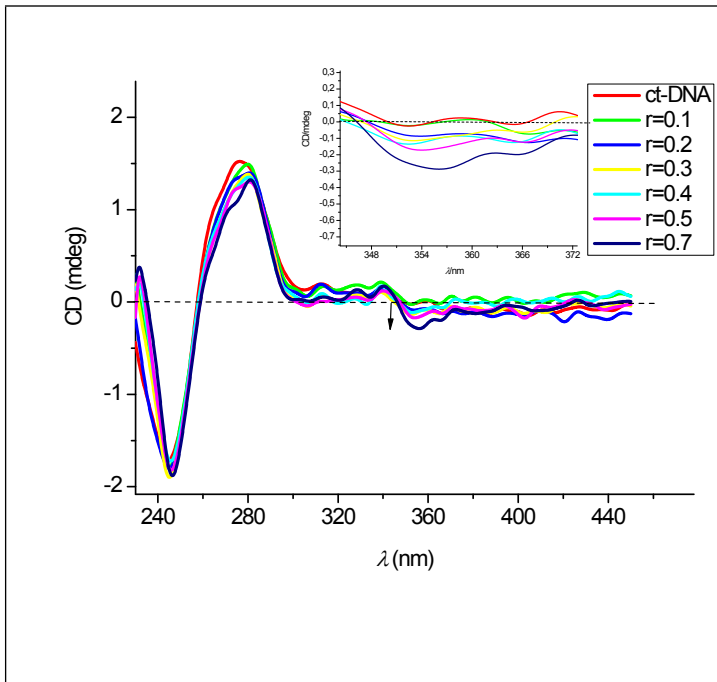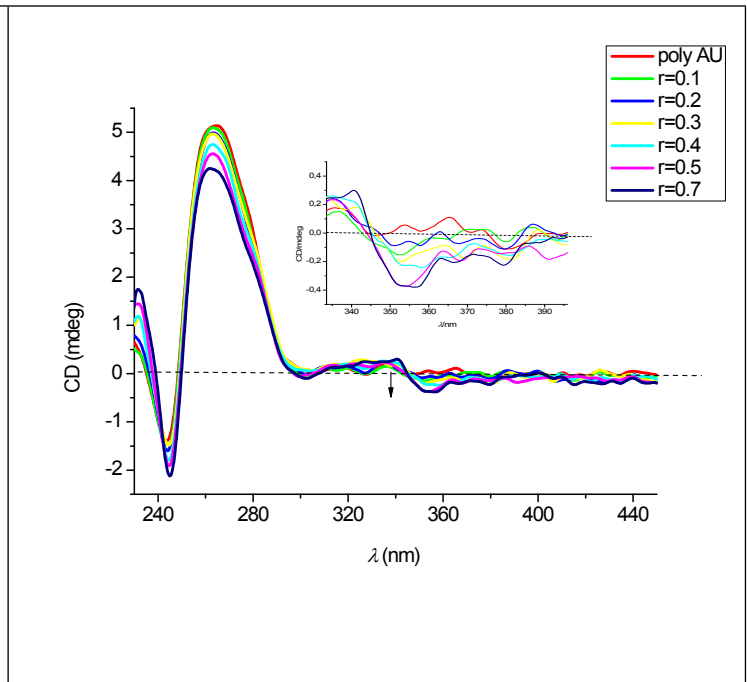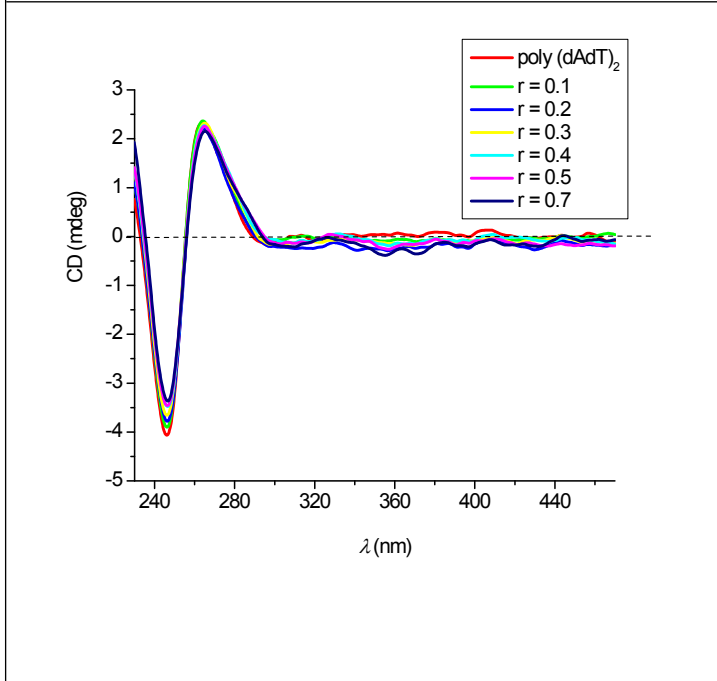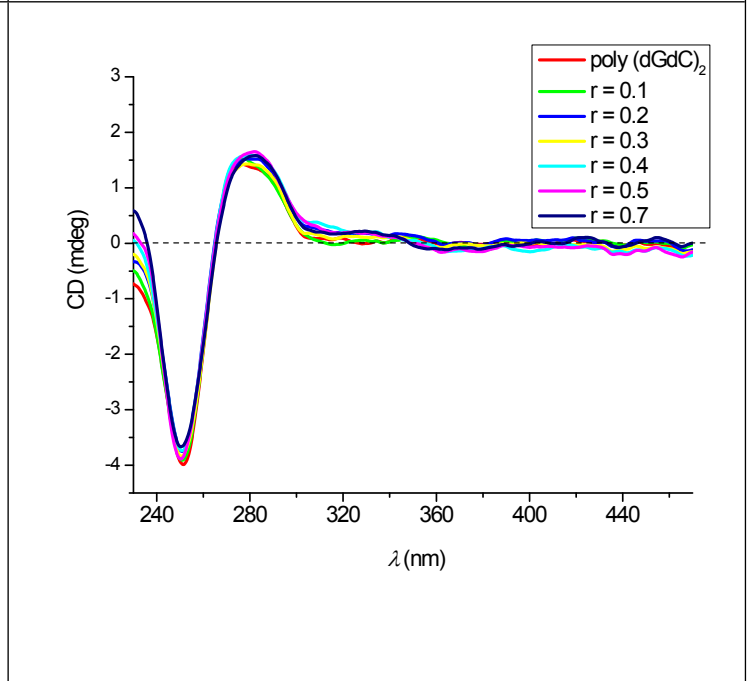

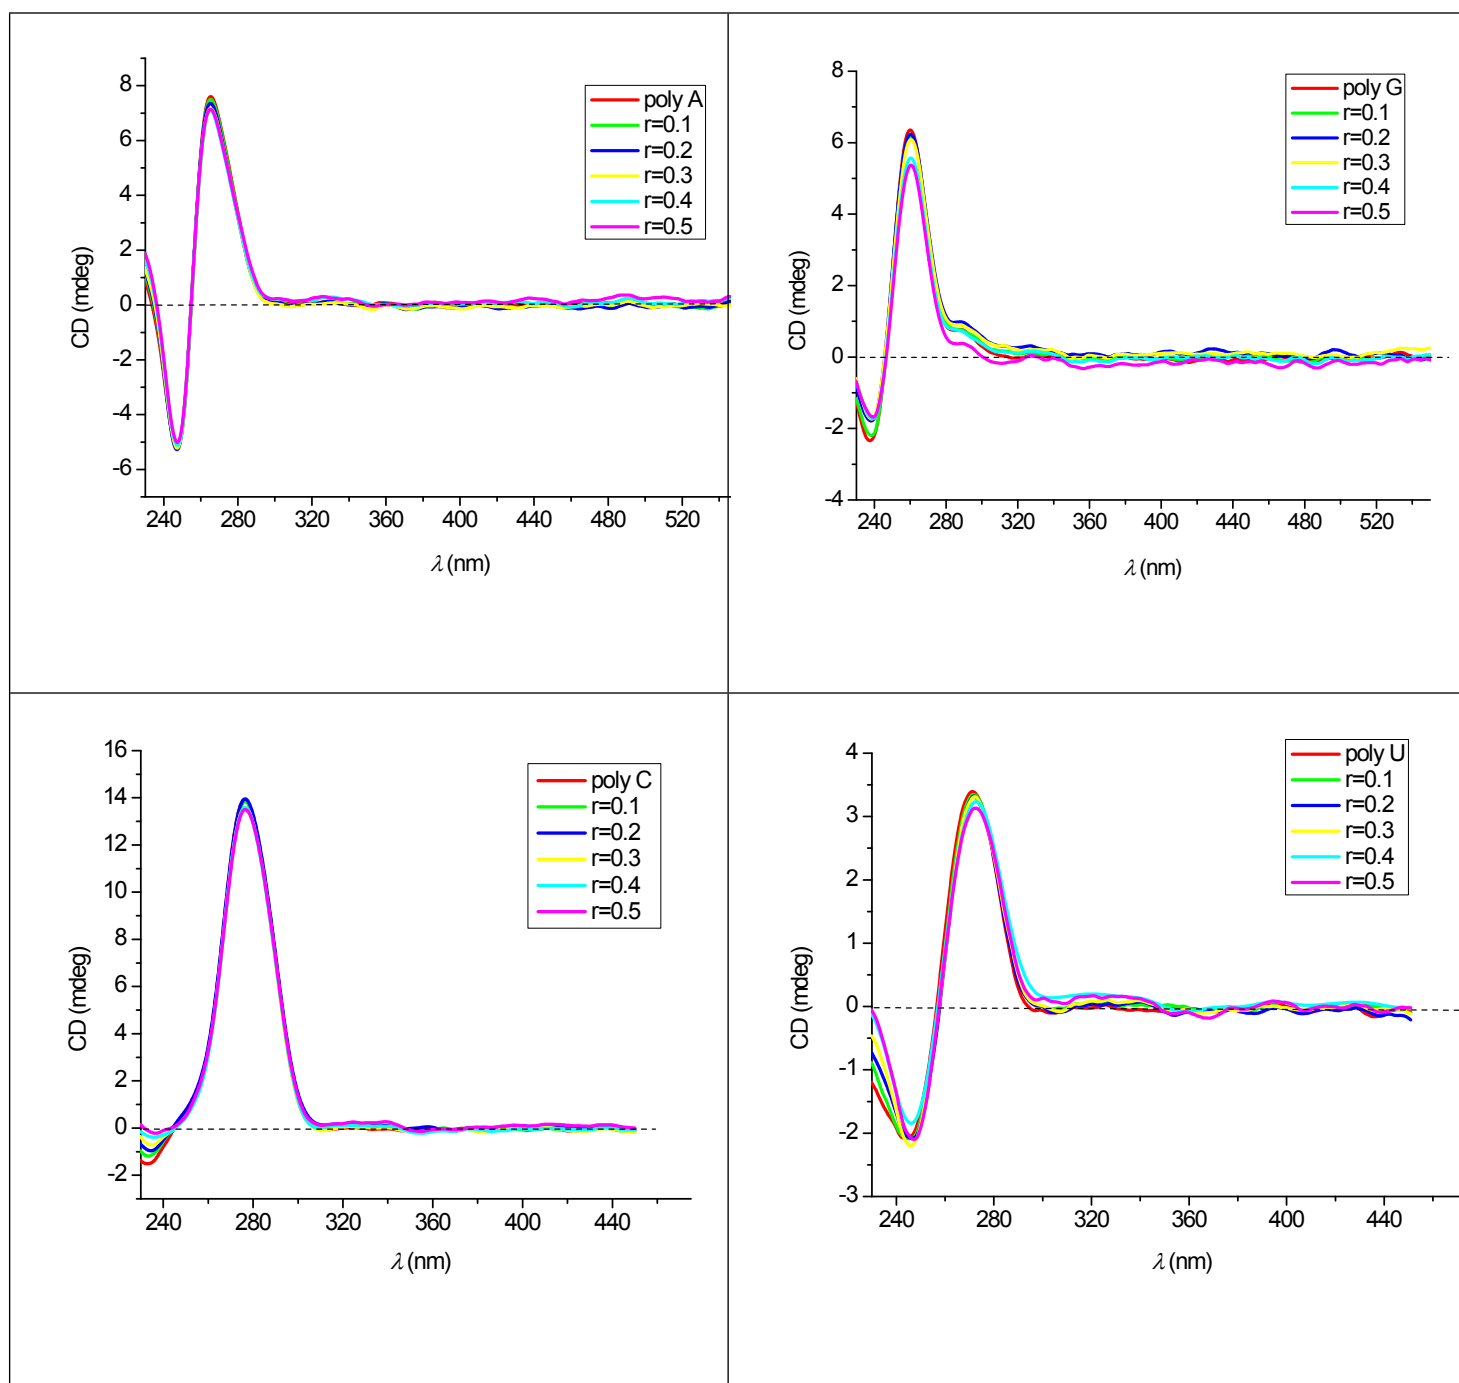

**Figure S16.** CD titration of ct-DNA, **poly A - poly U**, **poly (dAdT)<sub>2</sub>**, **poly (dGdC)<sub>2</sub>**, **poly A**, **poly G**, **poly C** and **poly U** (all DNA and RNA  $c = 2 \times 10^{-5}$  mol/L) with **3** at molar ratios  $r$   $_{[3]} / [polynucleotide] = 0.1 - 0.5$  (0.7). Done at pH 7, sodium cacodylate buffer,  $I = 0.05$  mol/L.

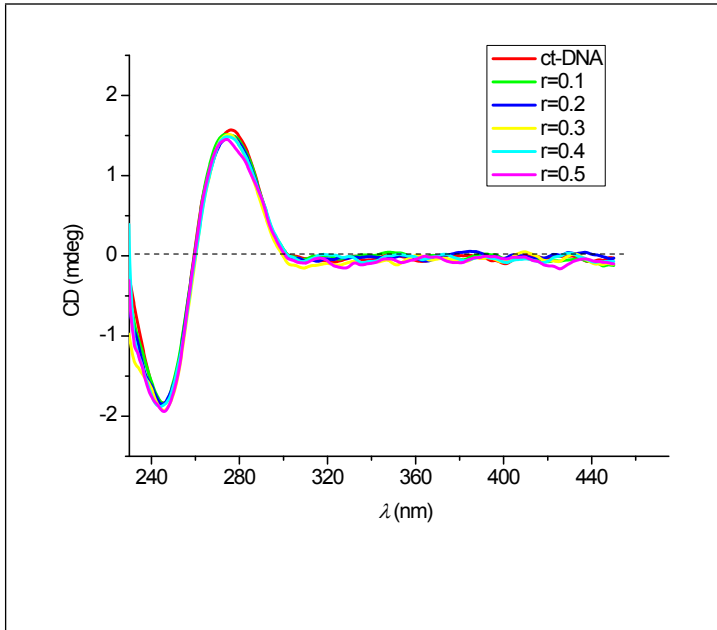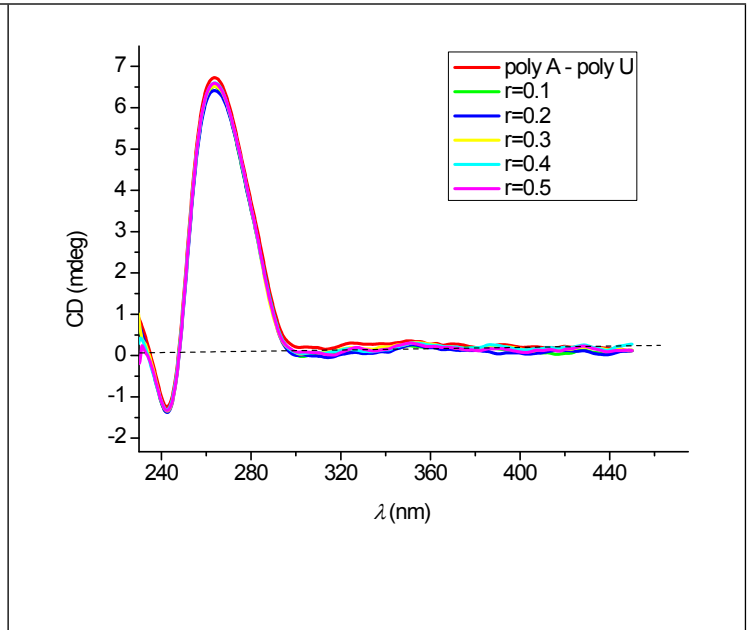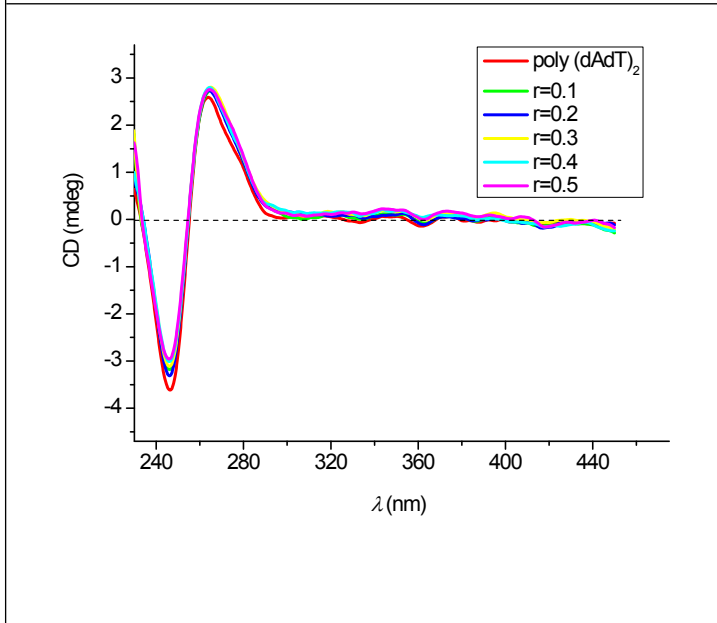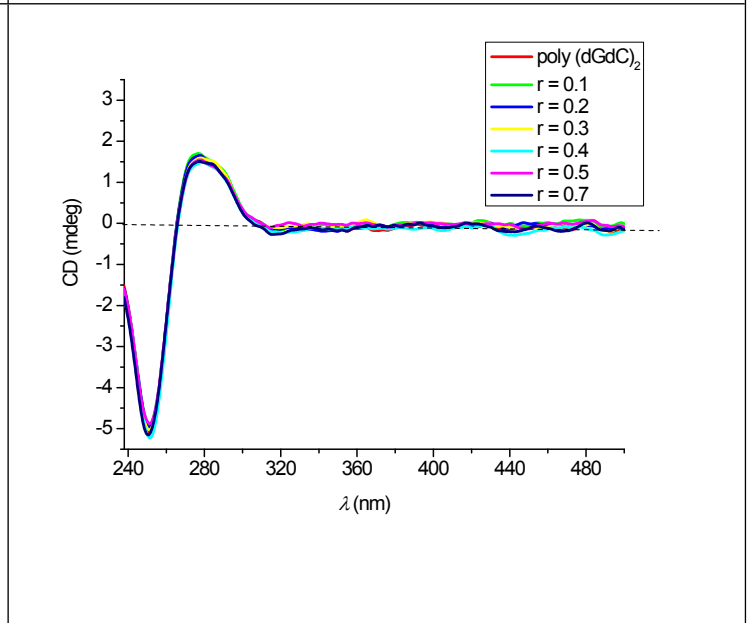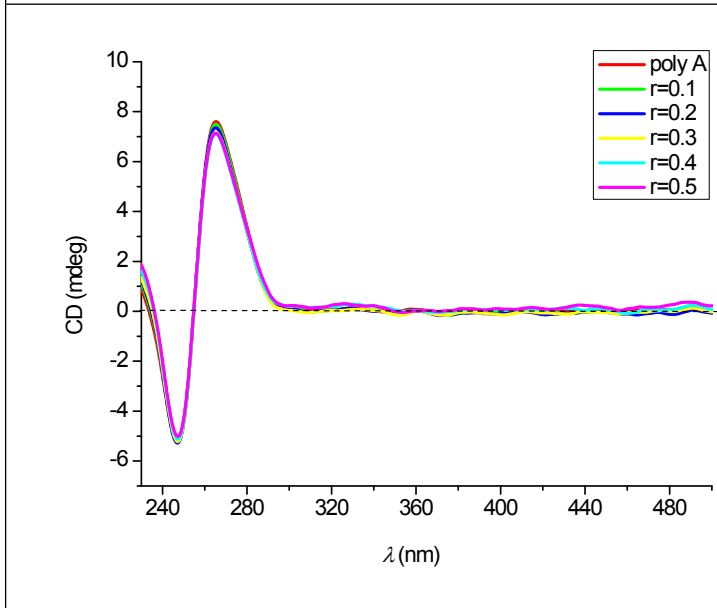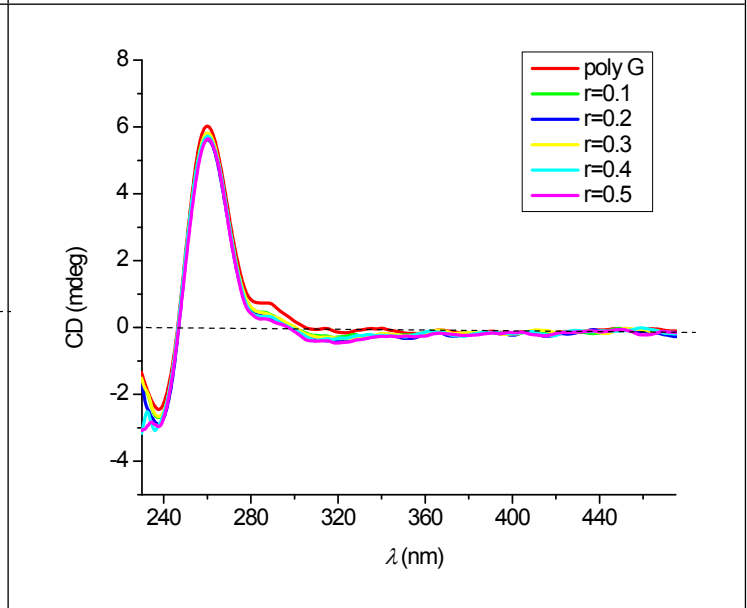



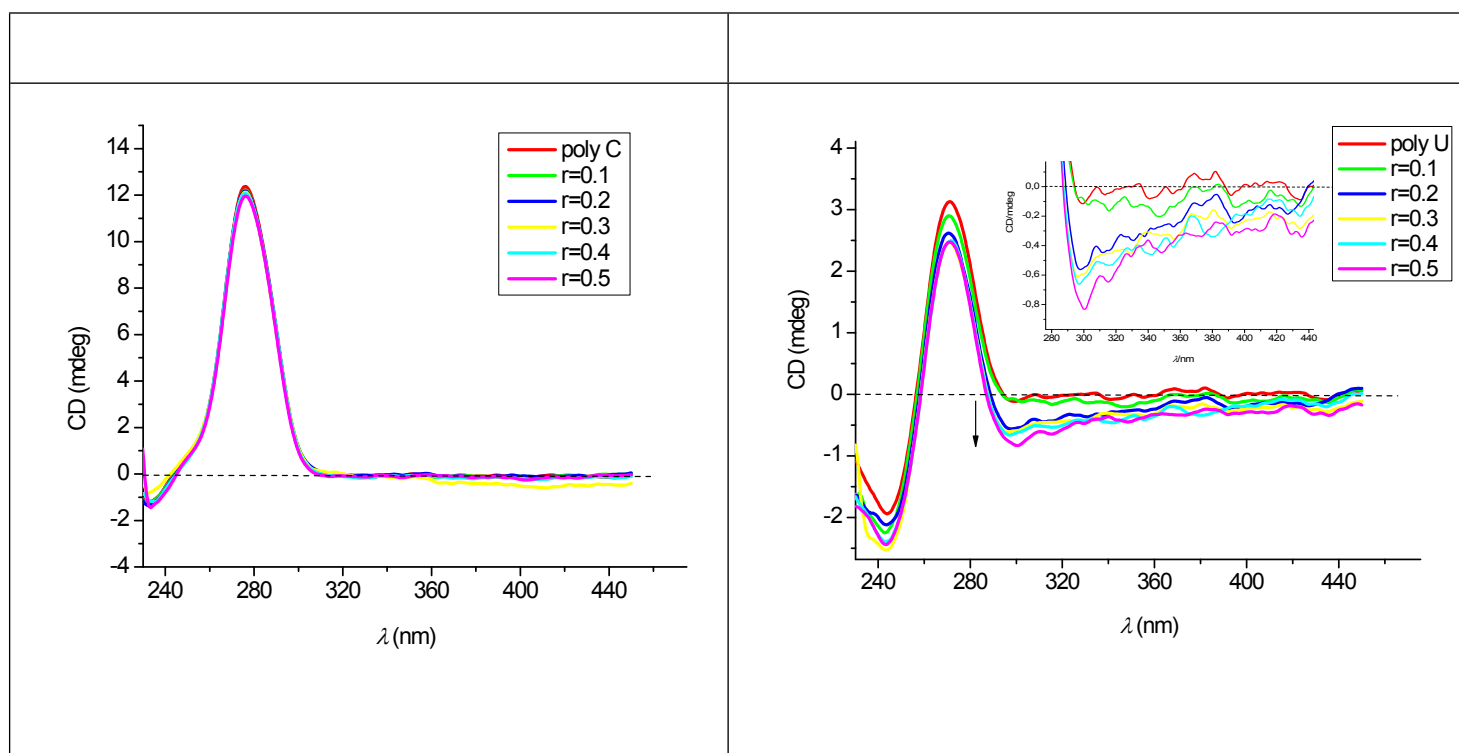

**Figure S17.** CD titration of ct-DNA, poly A - poly U, poly (dAdT)<sub>2</sub>, poly (dGdC)<sub>2</sub>, poly A, poly G, poly C and poly U (all DNA and RNA  $c = 2 \times 10^{-5}$  mol/L) with **4** at molar ratios  $r$  [4] / [polynucleotide] = 0.1 - 0.5. Done at pH 7, sodium cacodylate buffer,  $I = 0.05$  mol/L.

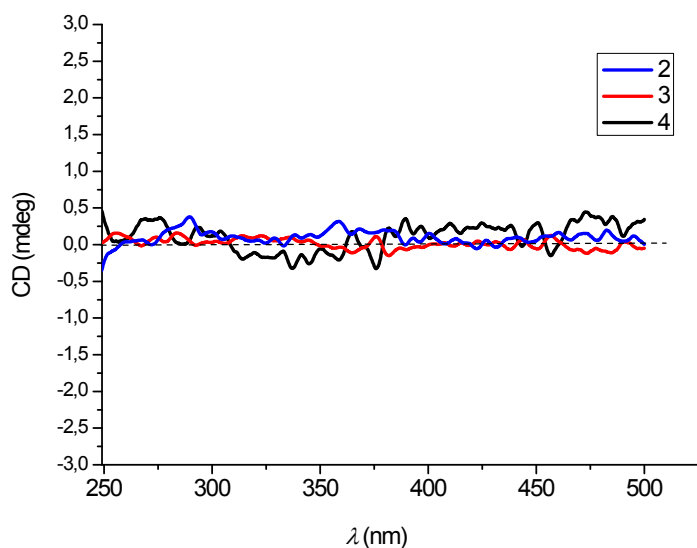

**Figure S18.** CD spectra of compounds **2**, **3** and **4** ( $c = 6 \times 10^{-6}$  mol/L). Done at pH 7, sodium cacodylate buffer,  $I = 0.05$  mol/L.

## Biological experiments:

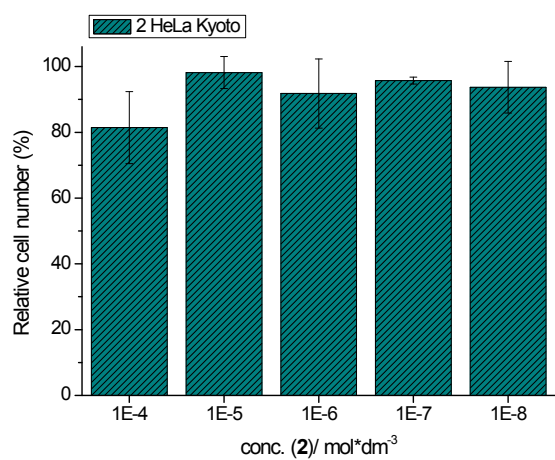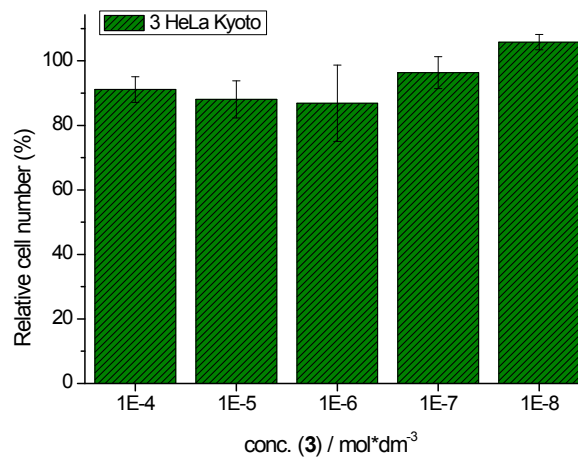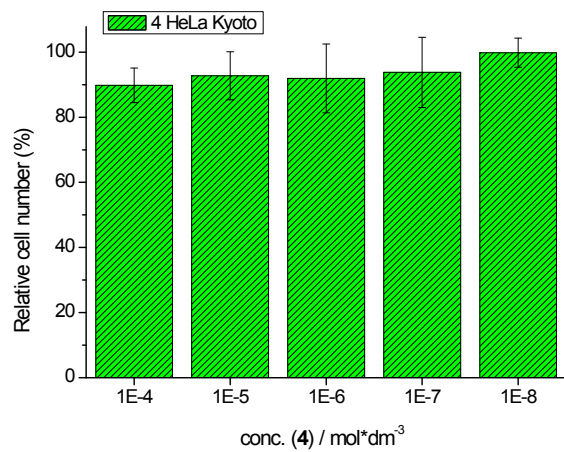

**Figure S19.** Effect of compounds 2-4 on HeLa Kyoto cell proliferation after 72 h treatment

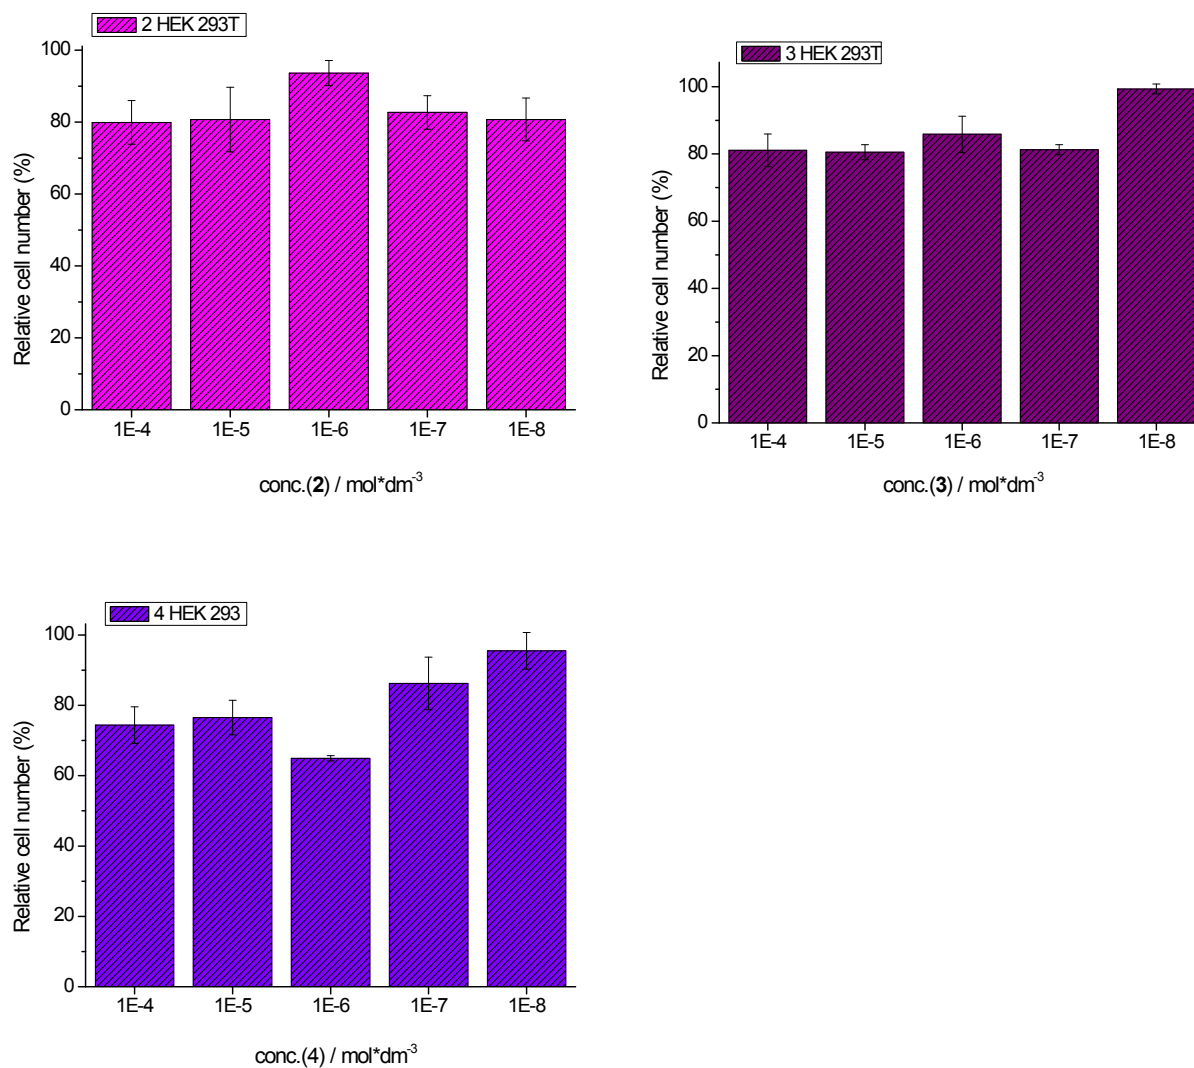

**Figure S20.** Effect of compounds **2-4** on HEK 293T cell proliferation after 72 h treatment

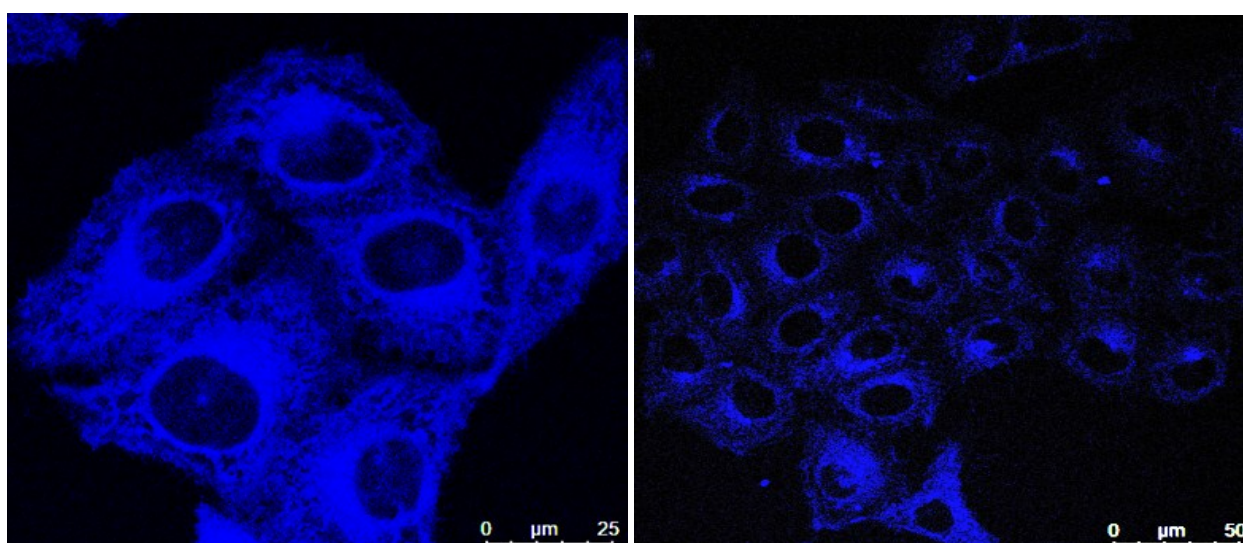

**Figure S21.** Confocal microscopy (Leica SP8X FLIM) of HeLa Kyoto cells after 2h of incubation with **2** (left) and **4** (right) hybrids ( $c = 2 \times 10^{-5}$  mol/L). The excitation peak value is 340 nm. Emission was detected at 360-405 nm.

# 1H and 13C NMR Spectra:

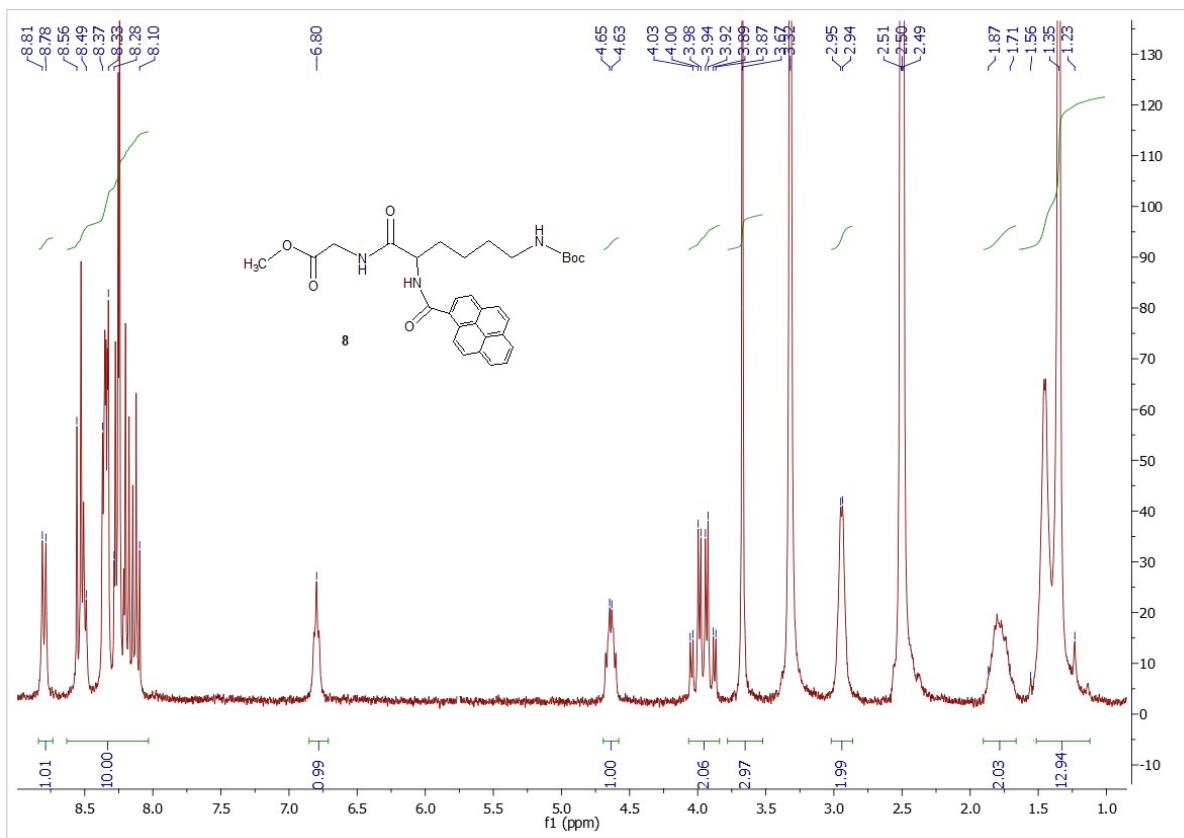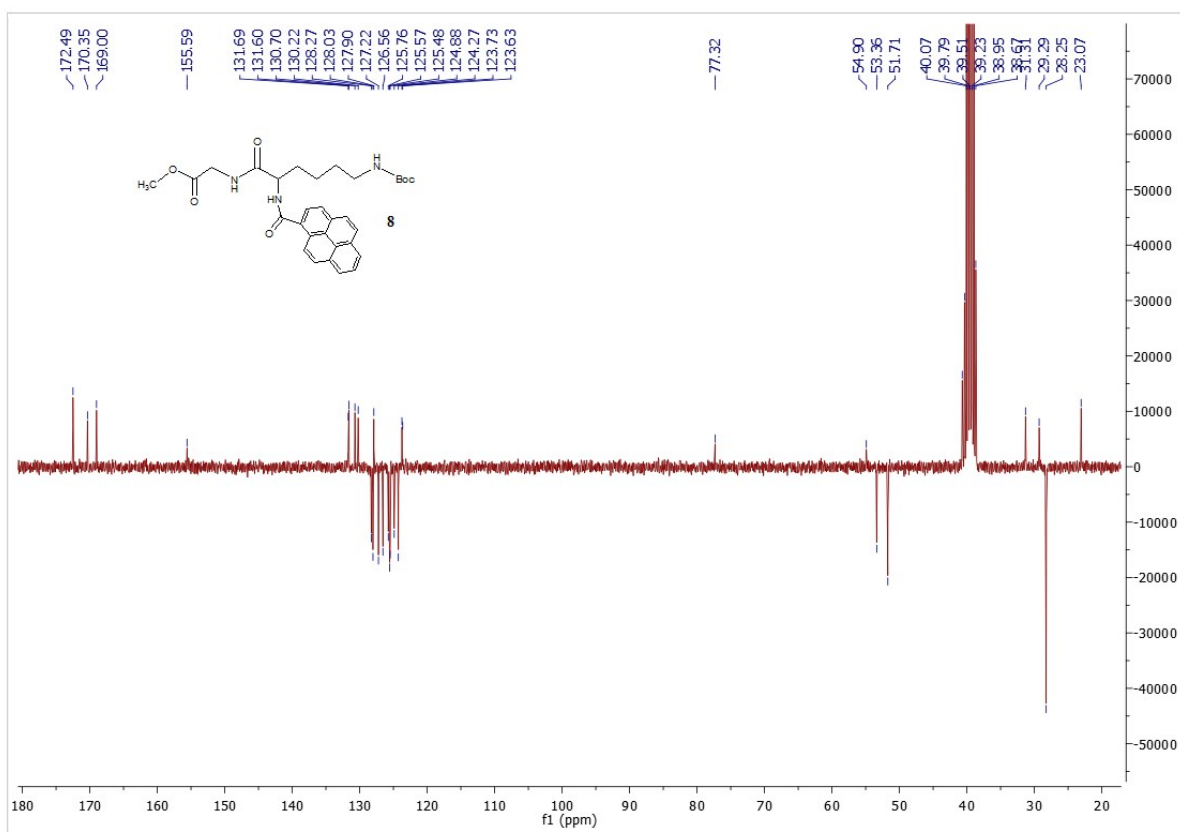

Figure S22.  $^1\text{H}$  and  $^{13}\text{C}$  NMR spectra of compound **8** in DMSO.

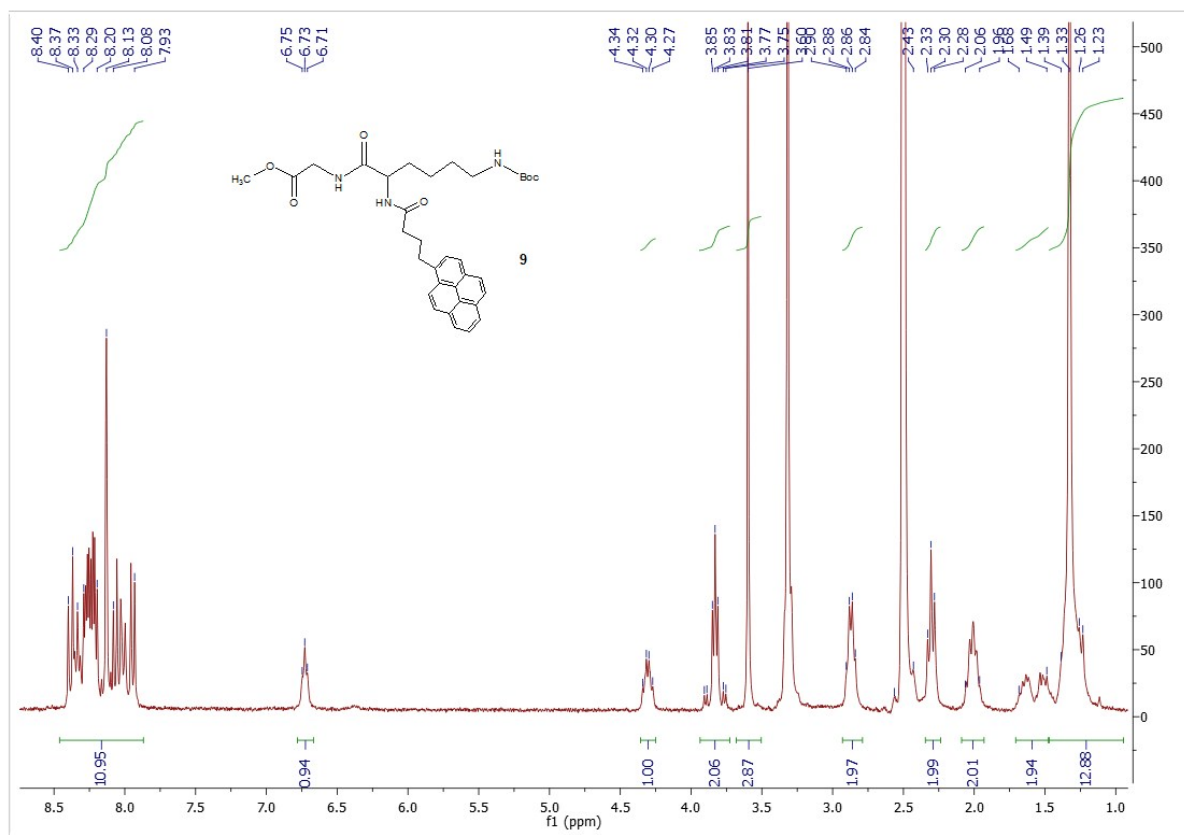

Figure S23.  $^1\text{H}$  and  $^{13}\text{C}$  NMR spectra of compound **9** in DMSO.

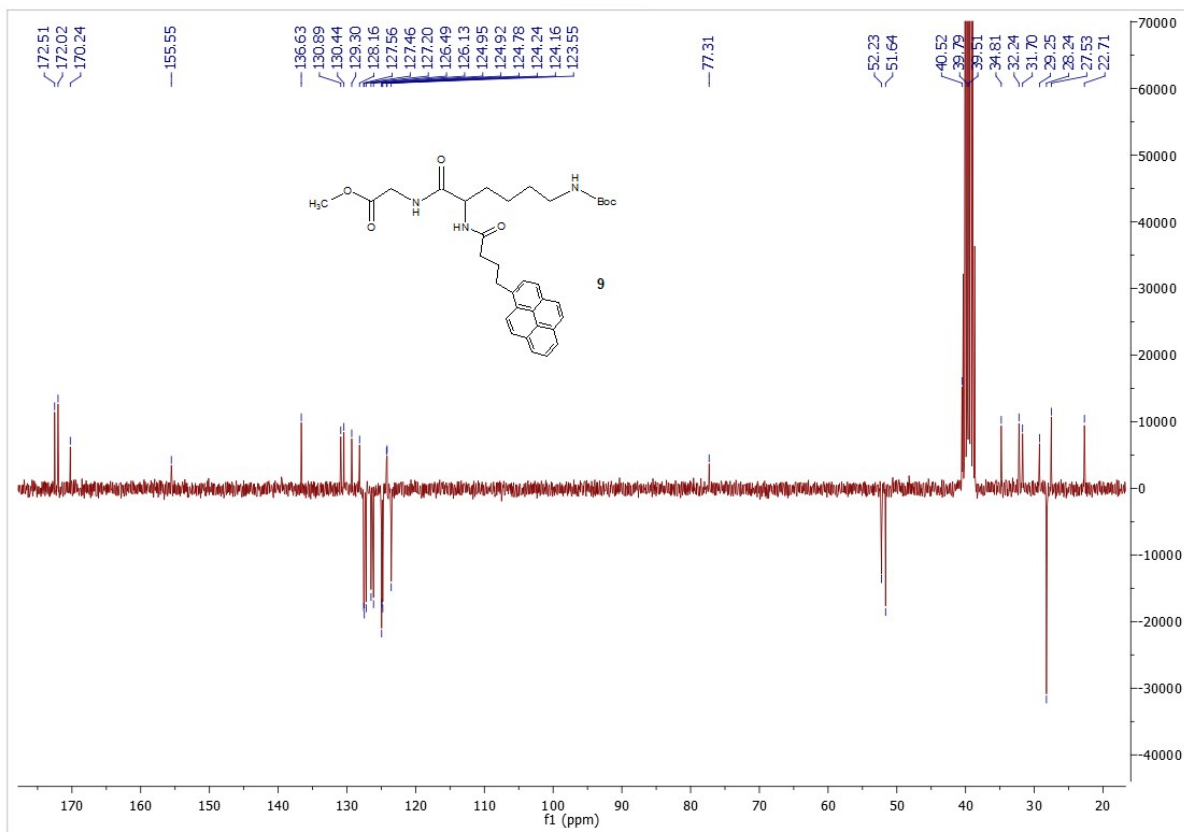

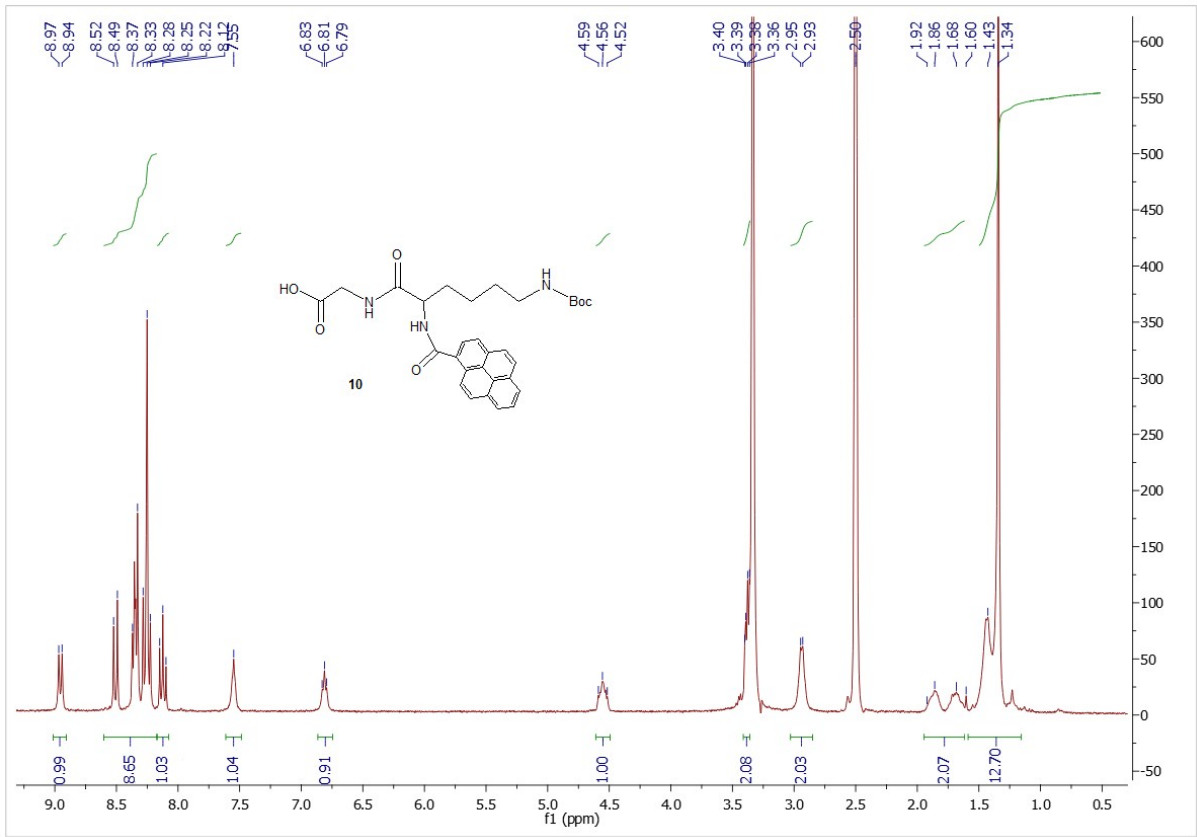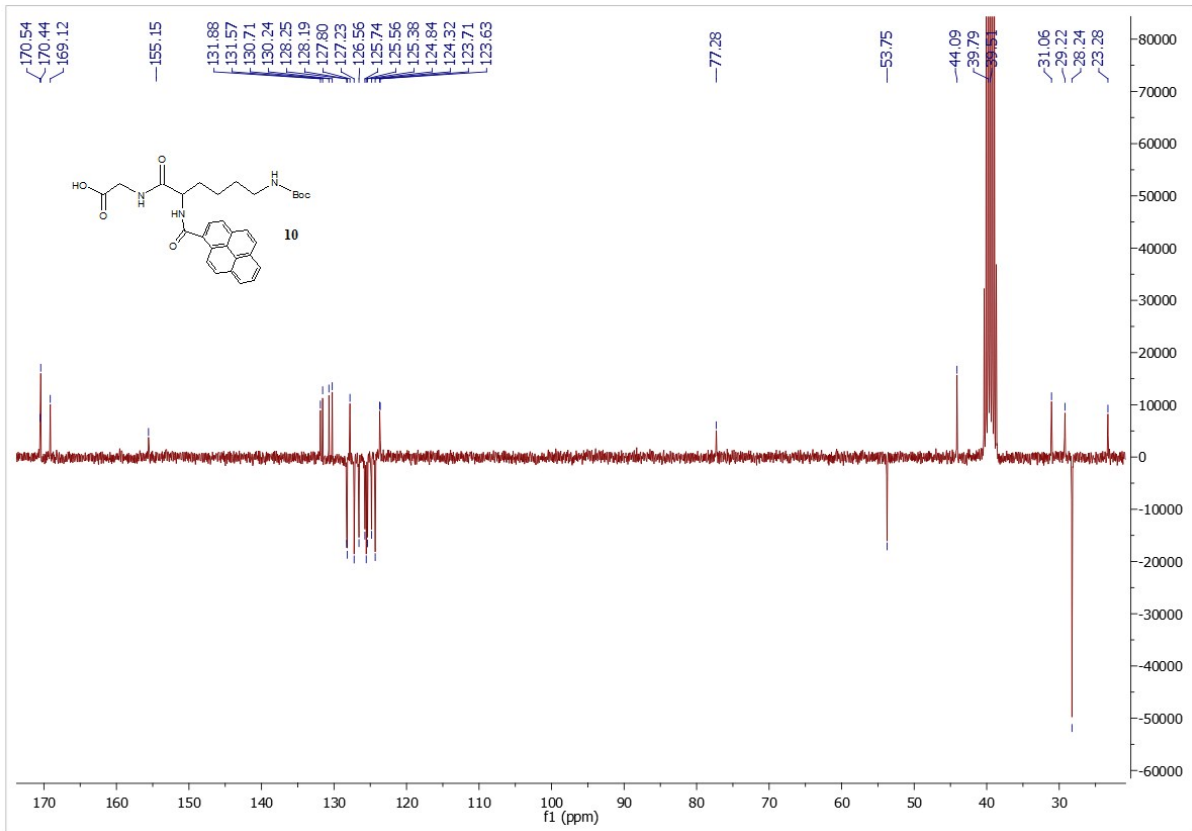

Figure S24.  $^1\text{H}$  and  $^{13}\text{C}$  NMR spectra of compound **10** in DMSO.

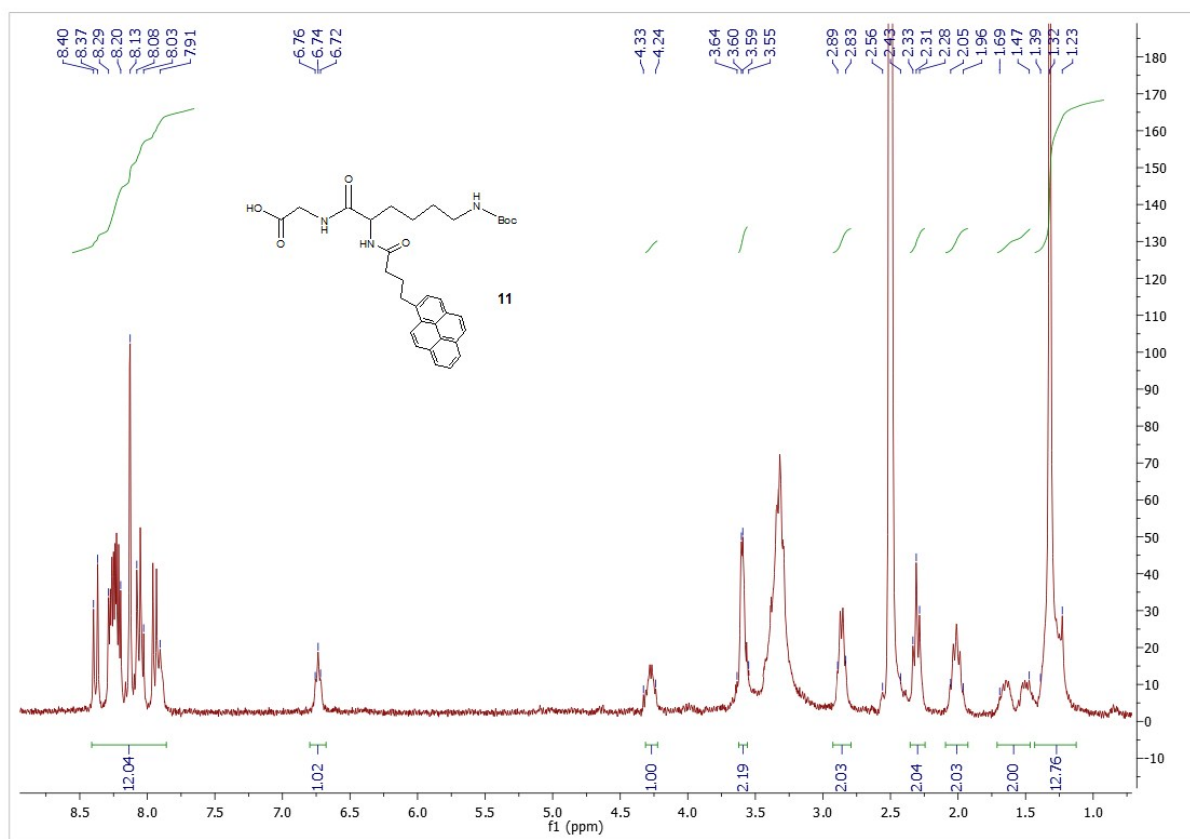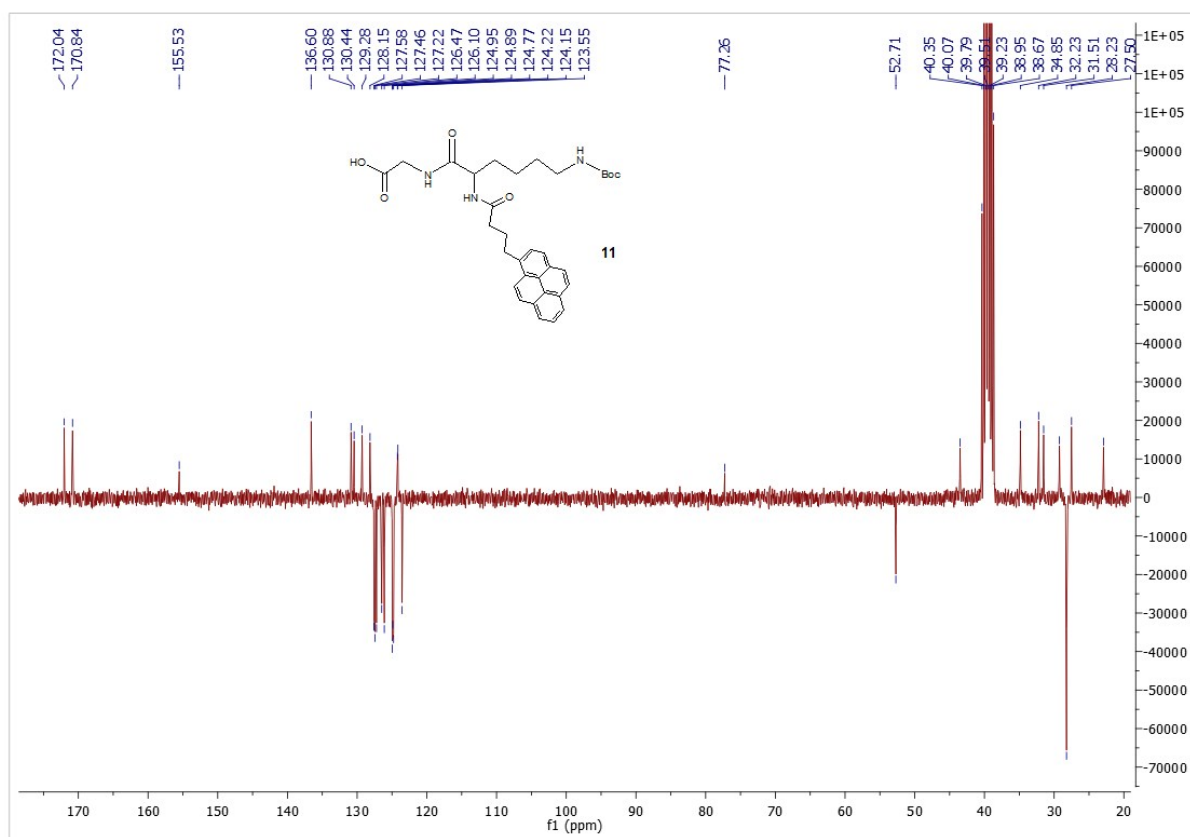

Figure S25.  $^1\text{H}$  and  $^{13}\text{C}$  NMR spectra of compound **11** in DMSO.

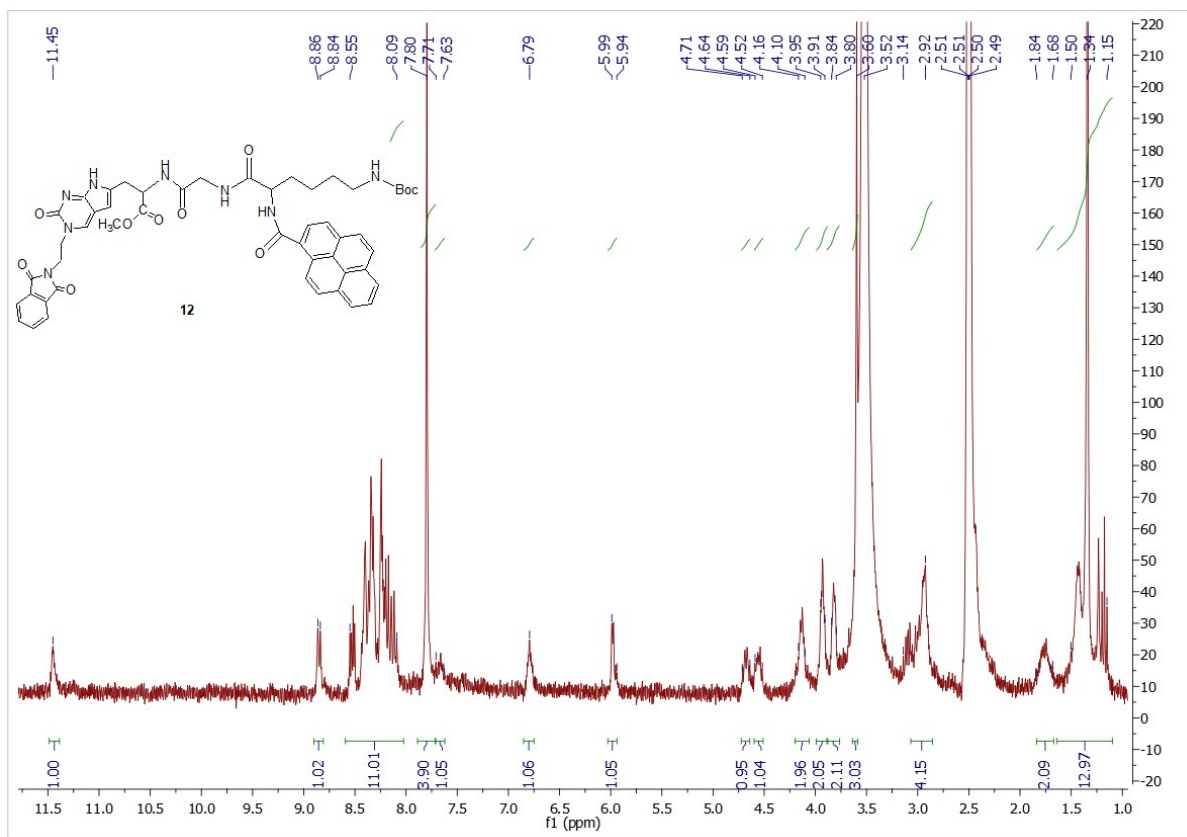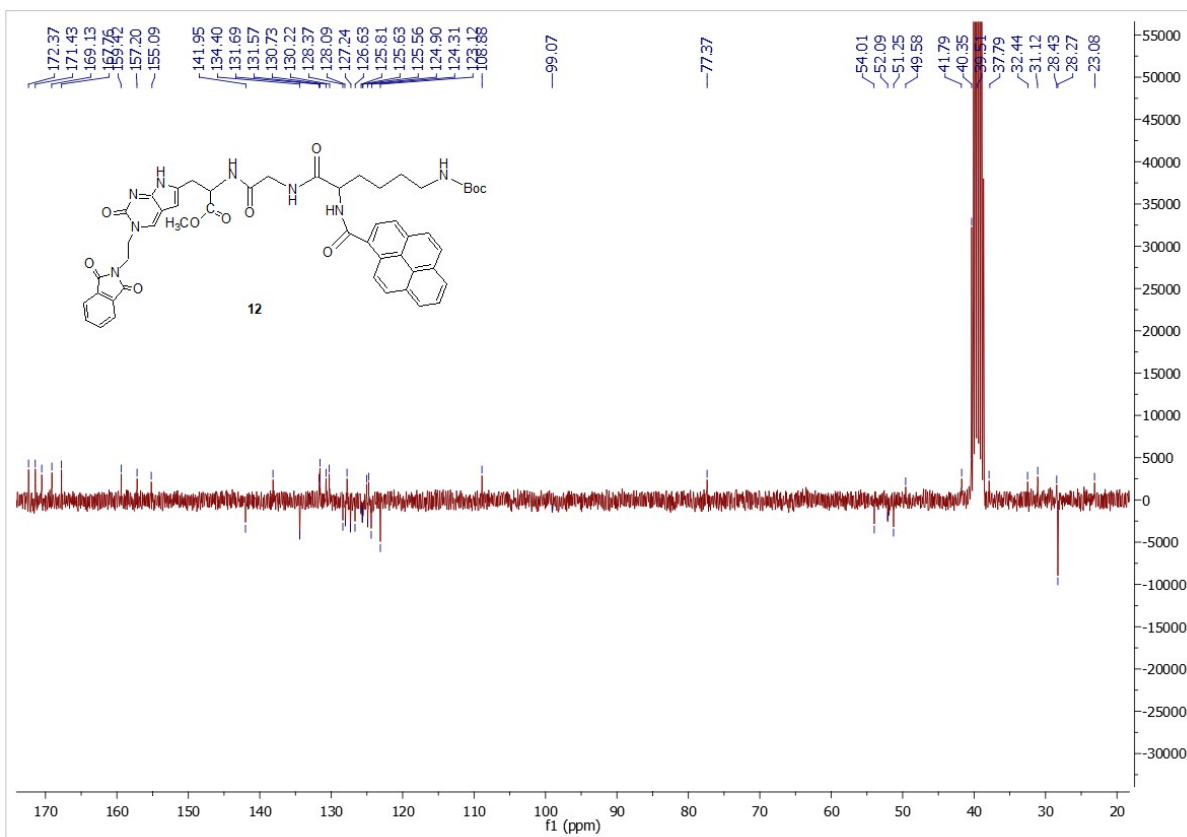

Figure S26. <sup>1</sup>H and <sup>13</sup>C NMR spectra of compound 12 in DMSO.



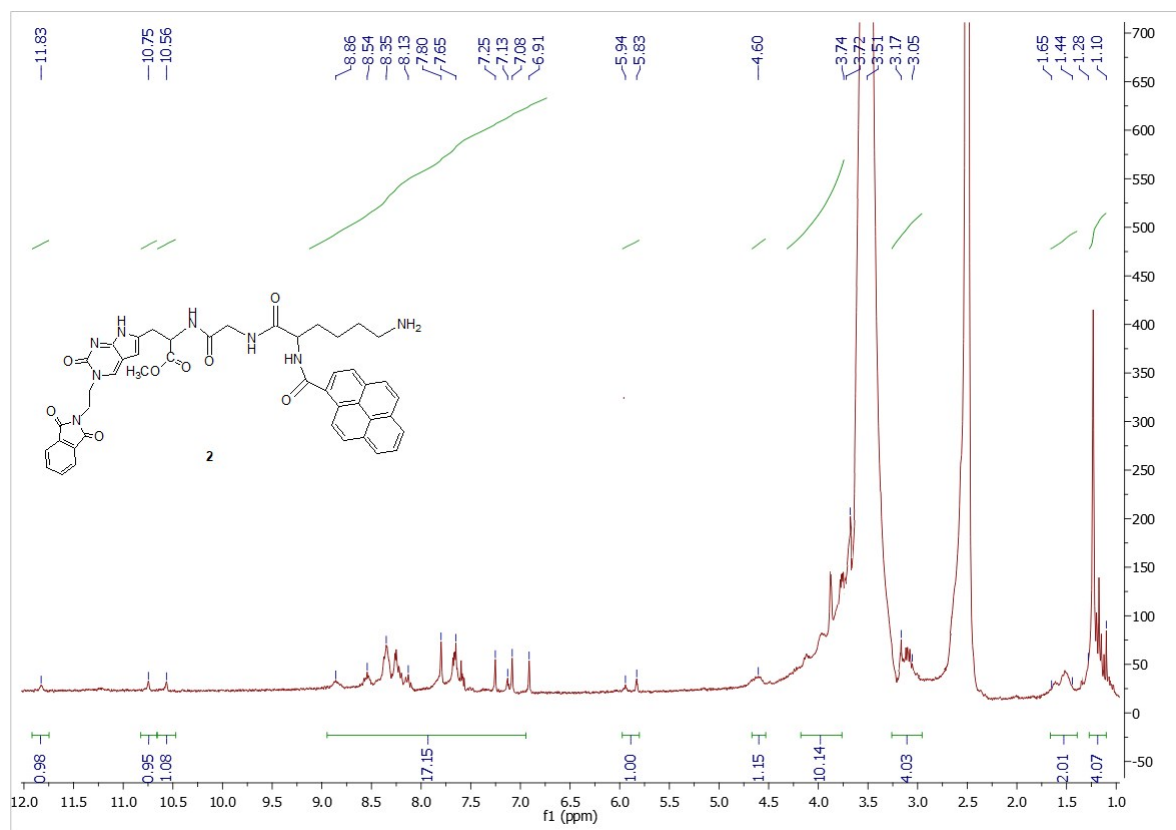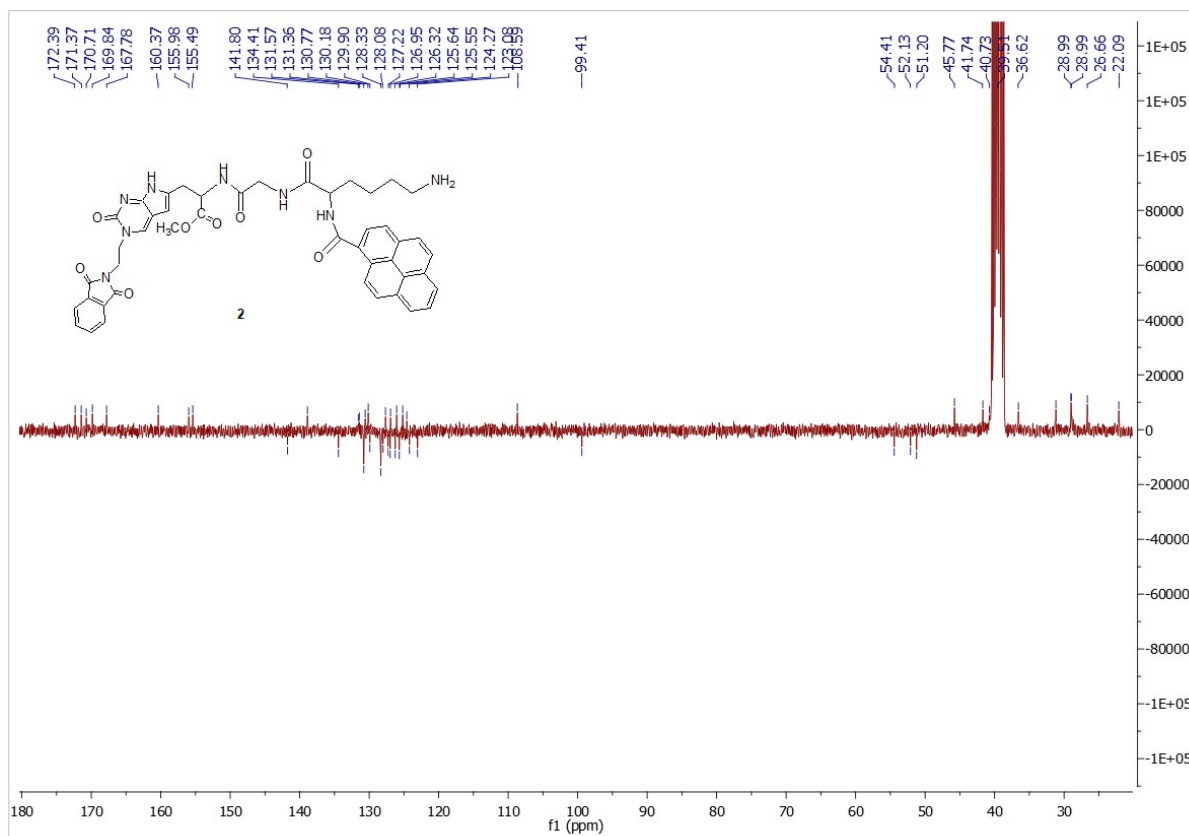

Figure S27. <sup>1</sup>H and <sup>13</sup>C NMR spectra of compound 2 in DMSO.

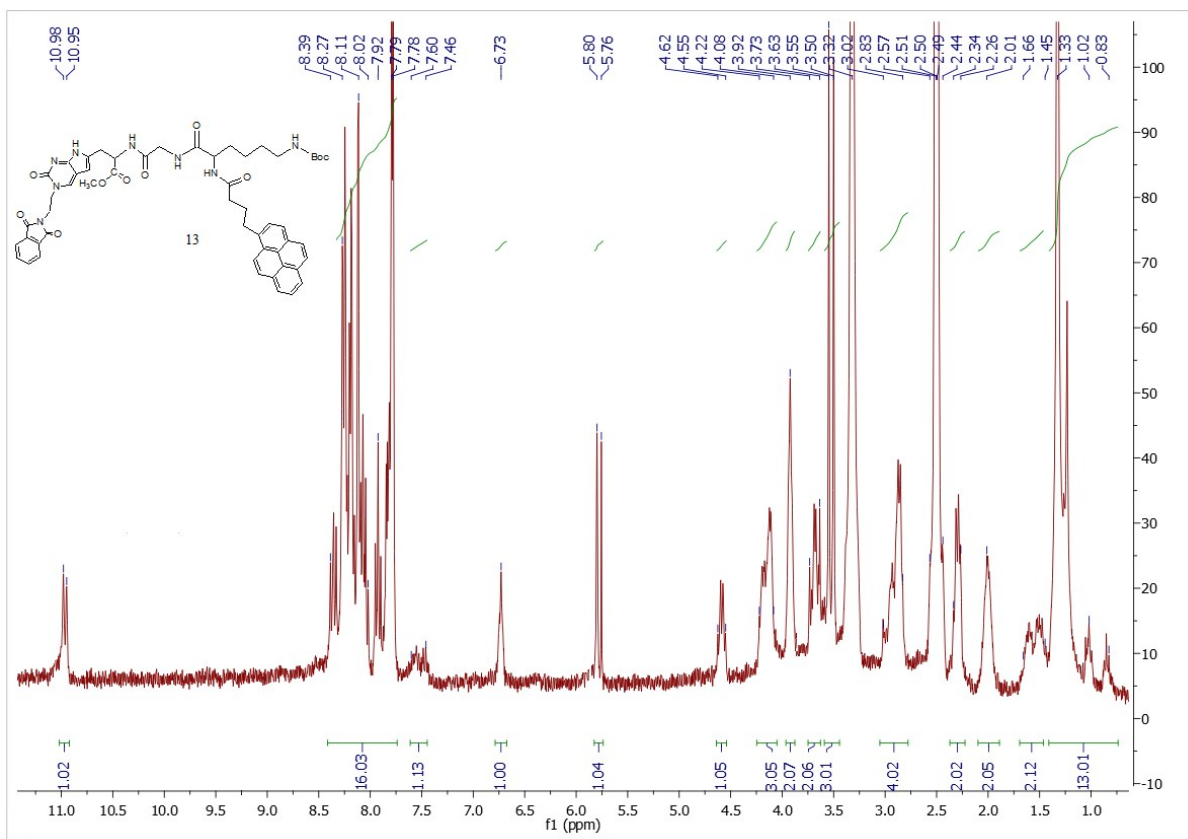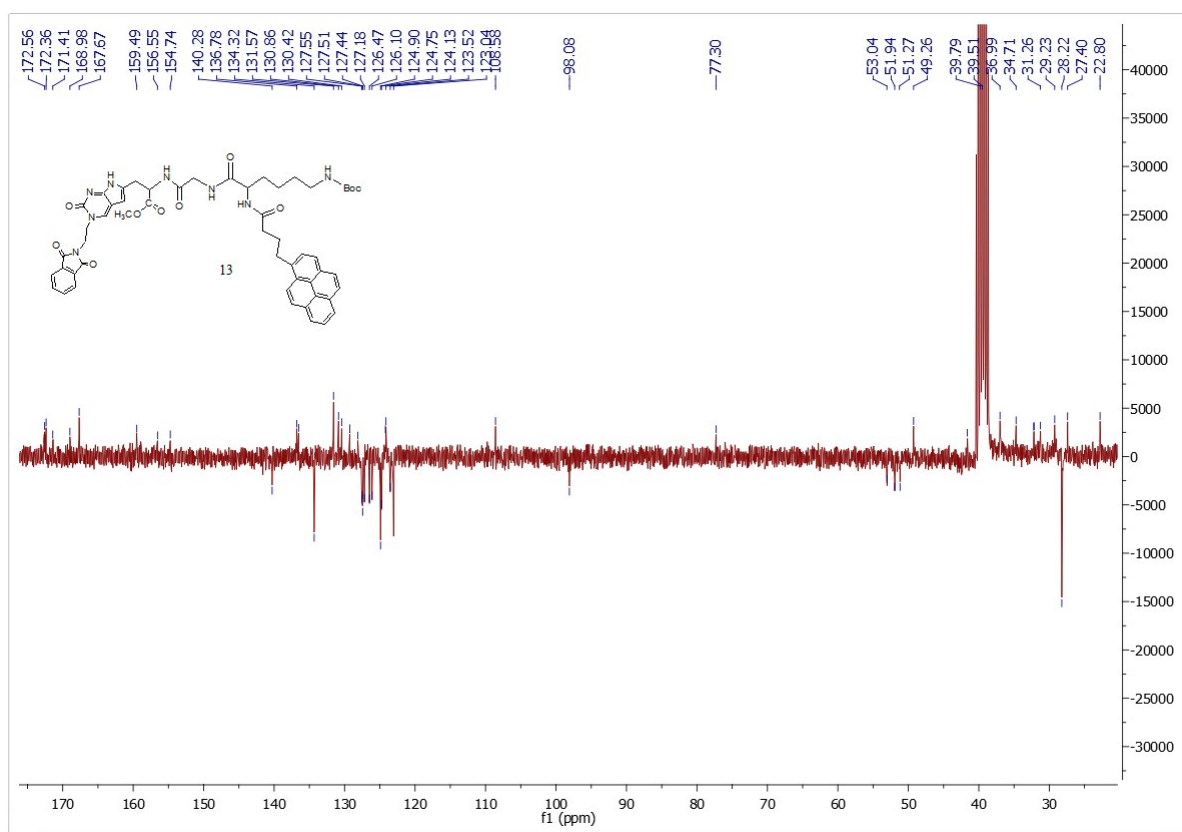

Figure S28. <sup>1</sup>H and <sup>13</sup>C NMR spectra of compound 13 in DMSO.

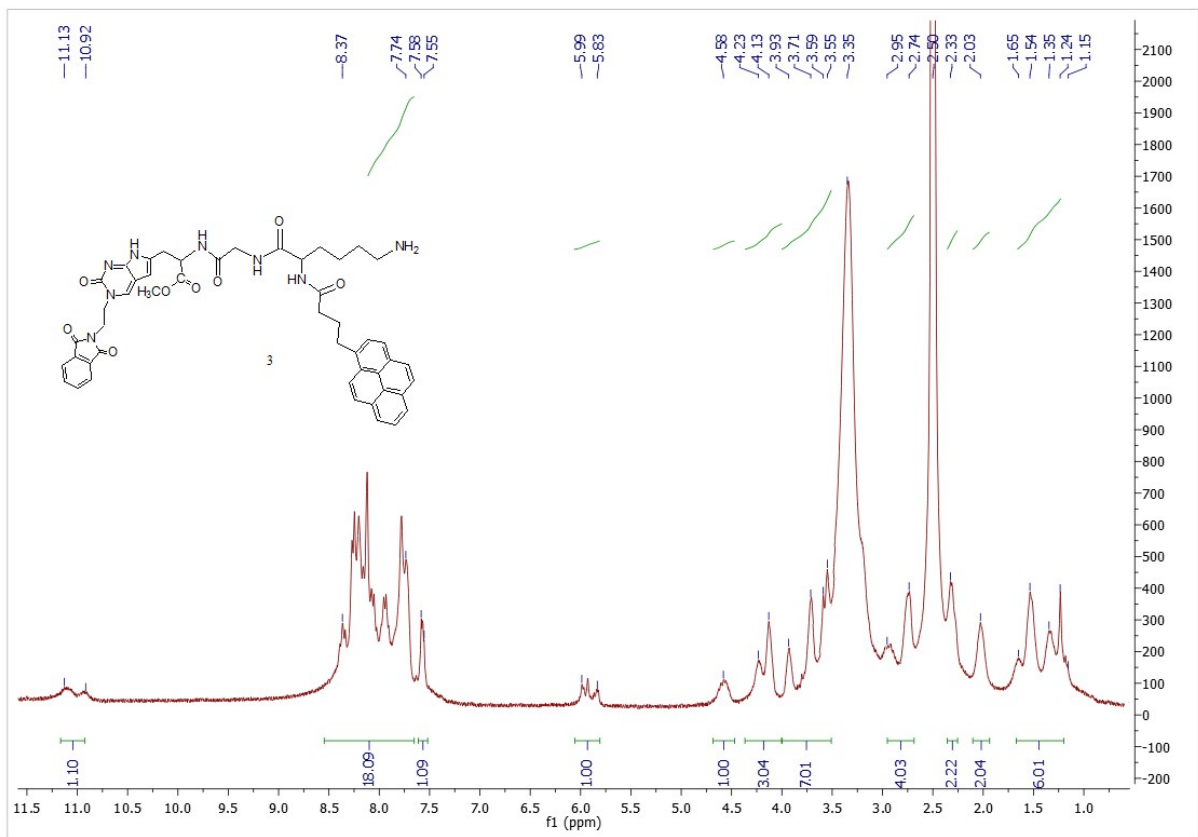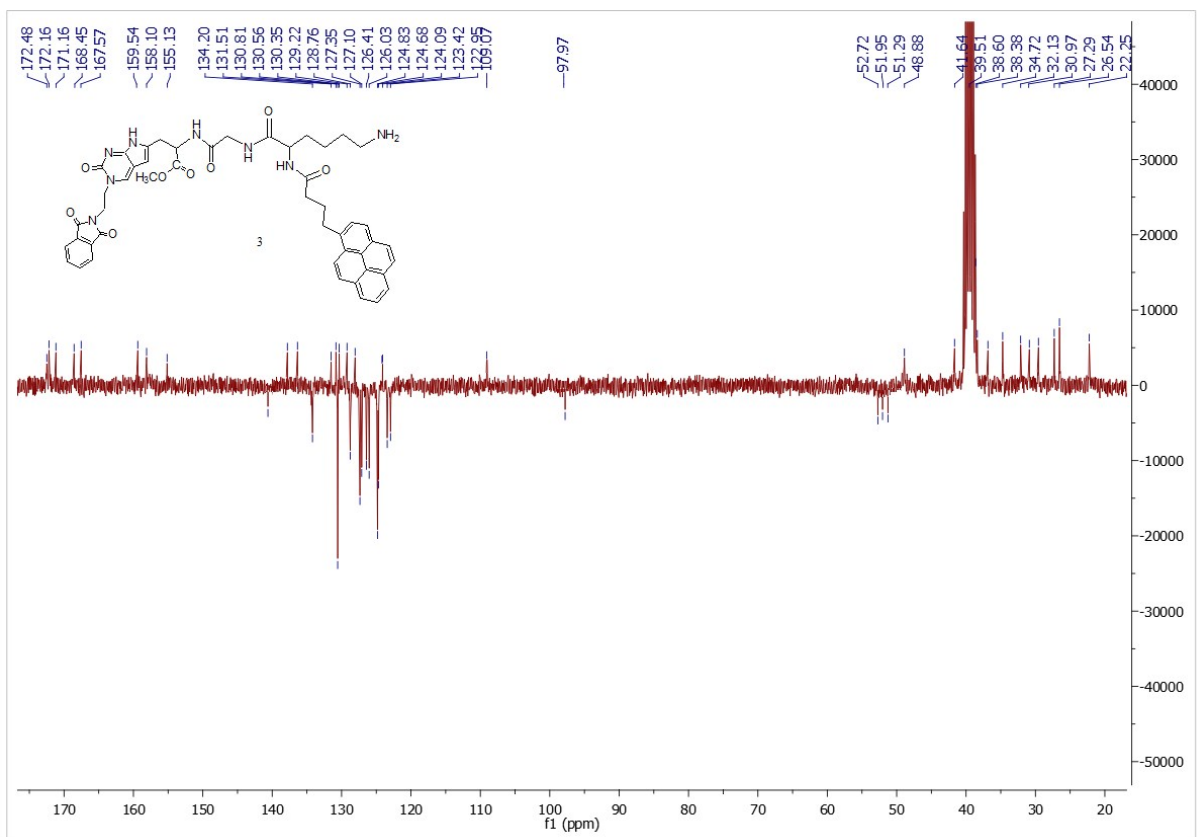

**Figure S29.** <sup>1</sup>H and <sup>13</sup>C NMR spectra of compound 3 in DMSO.

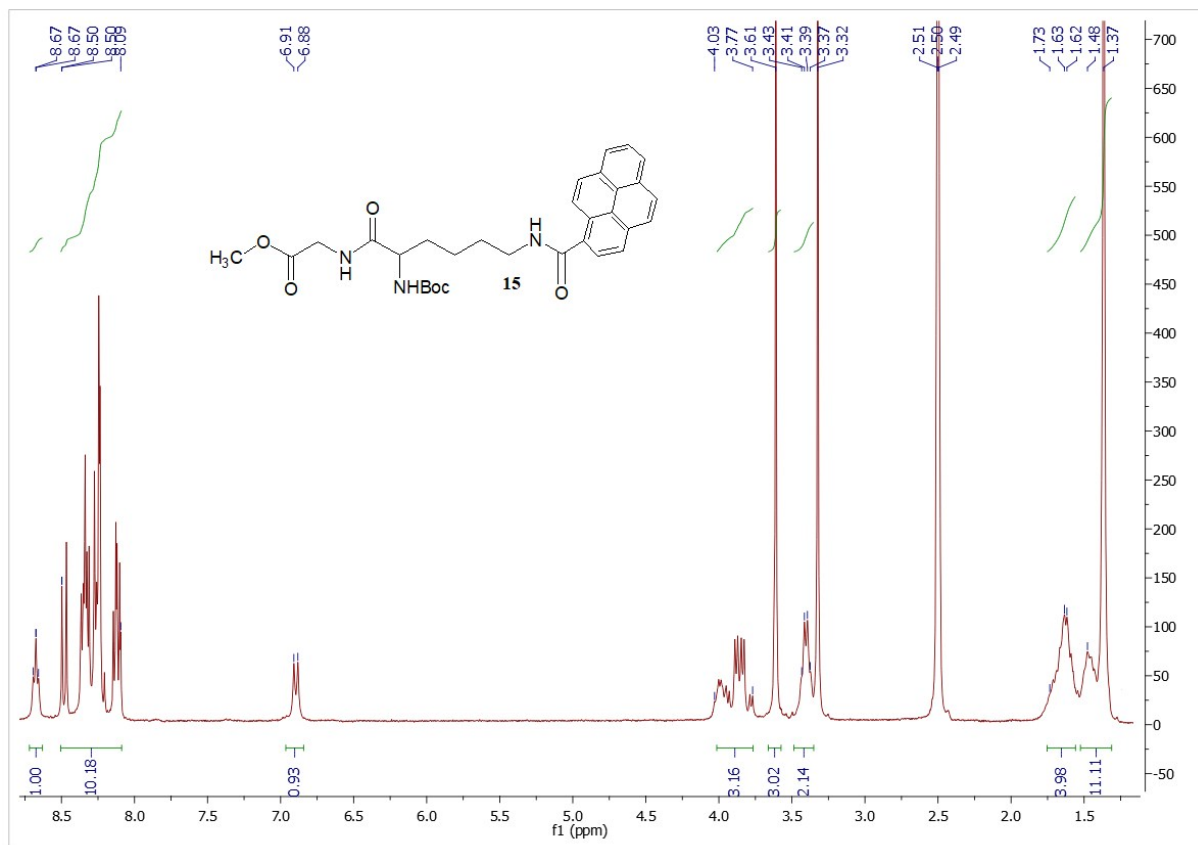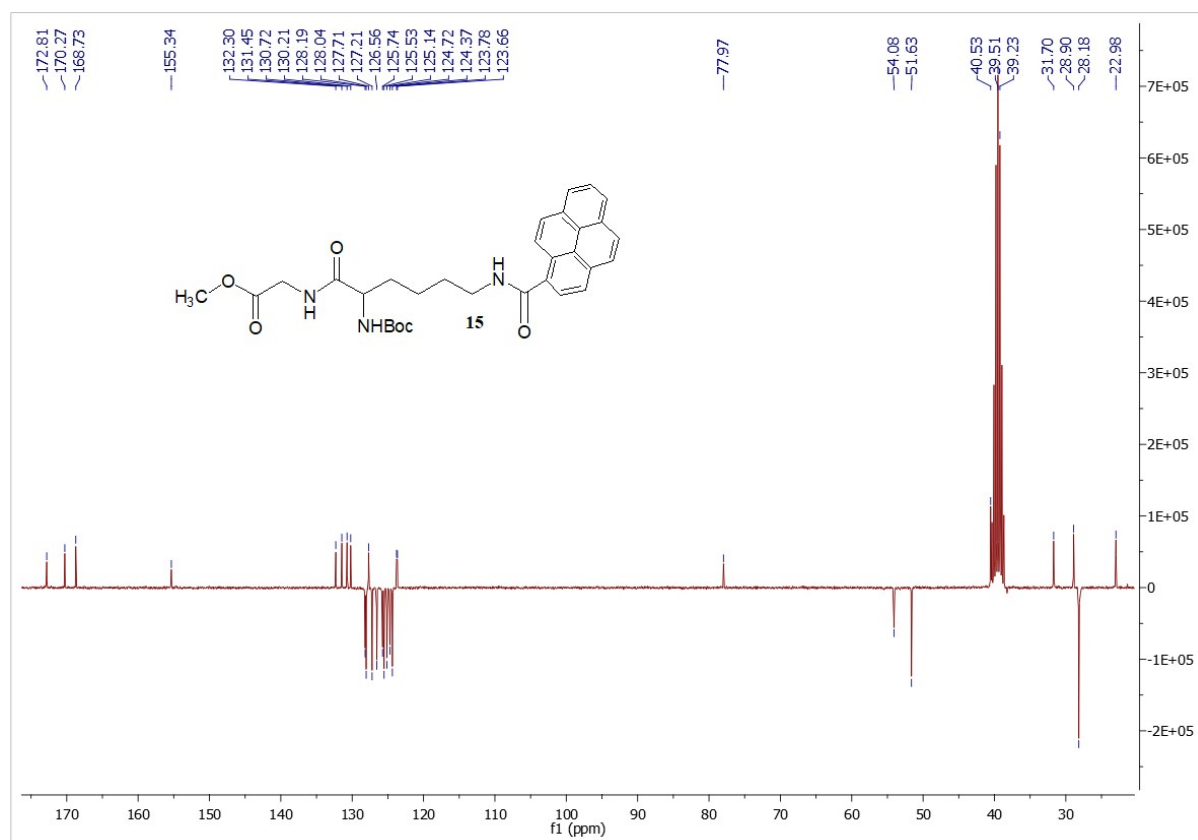

Figure S30. <sup>1</sup>H and <sup>13</sup>C NMR spectra of compound 15 in DMSO.

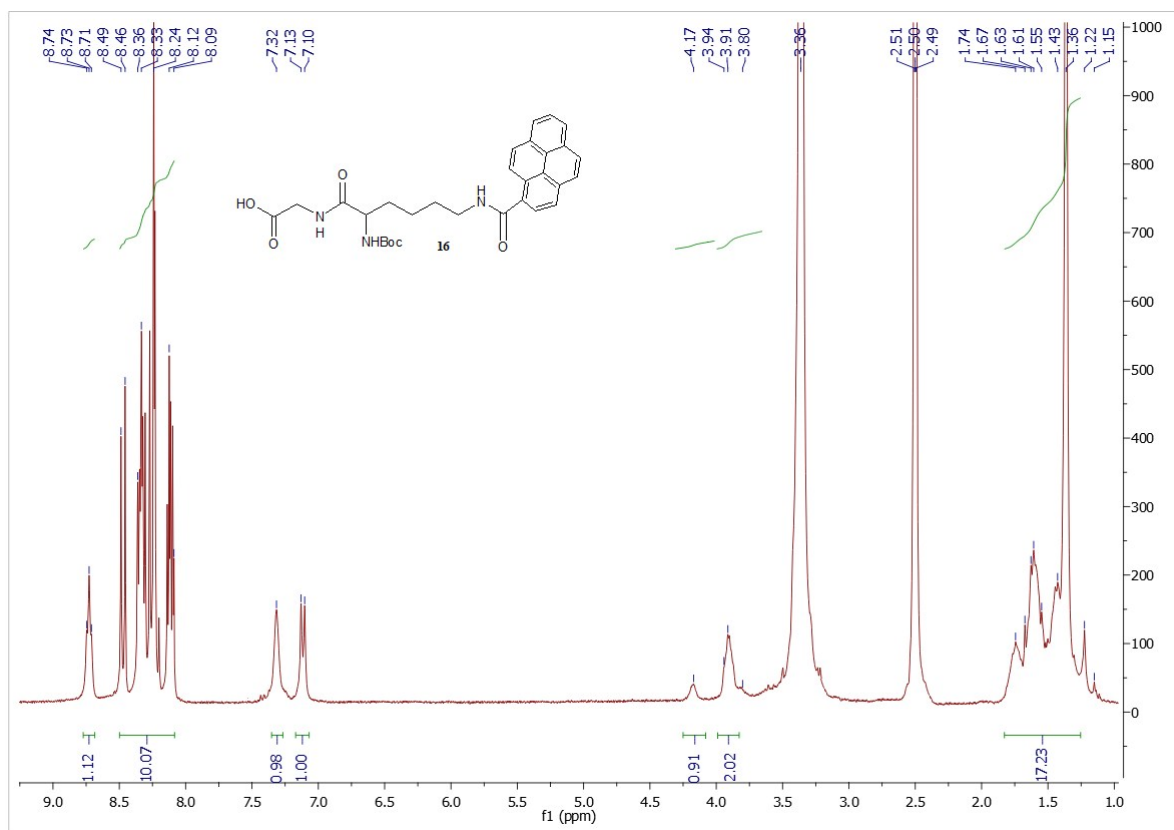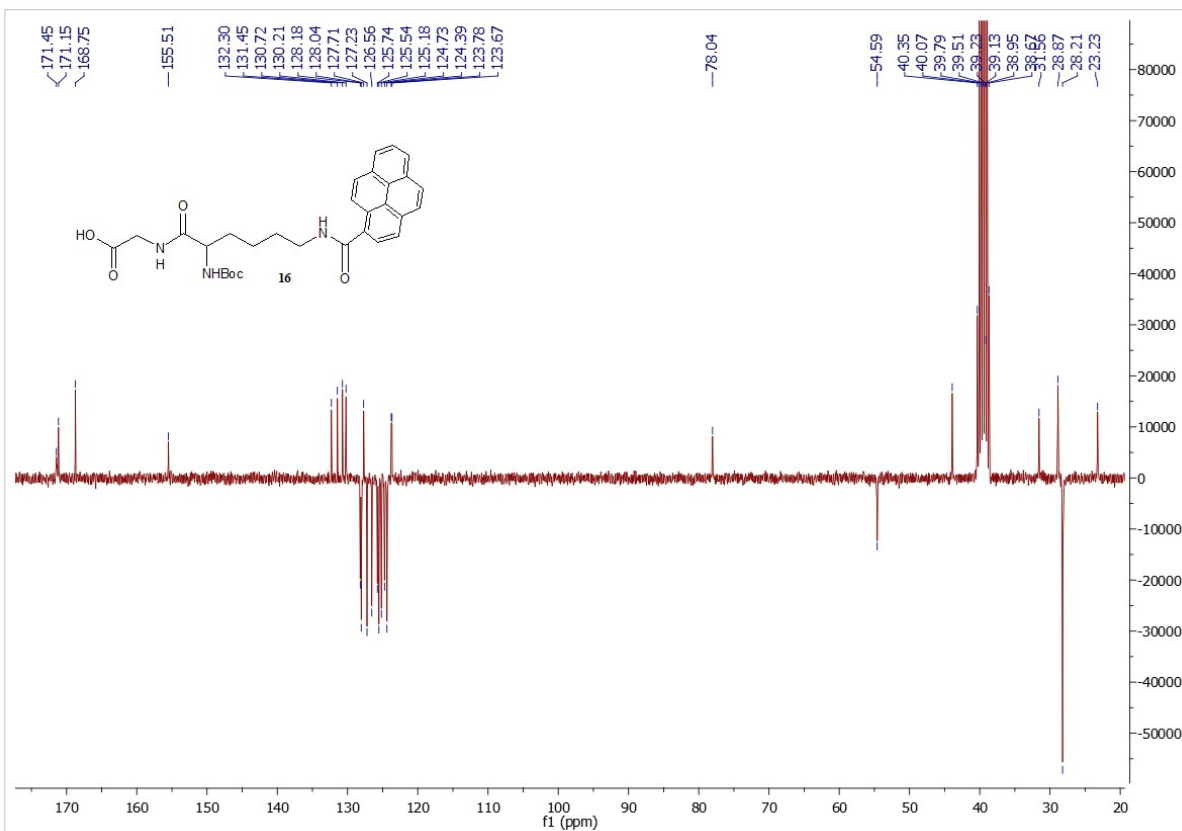

**Figure S31.** <sup>1</sup>H and <sup>13</sup>C NMR spectra of compound 16 in DMSO.

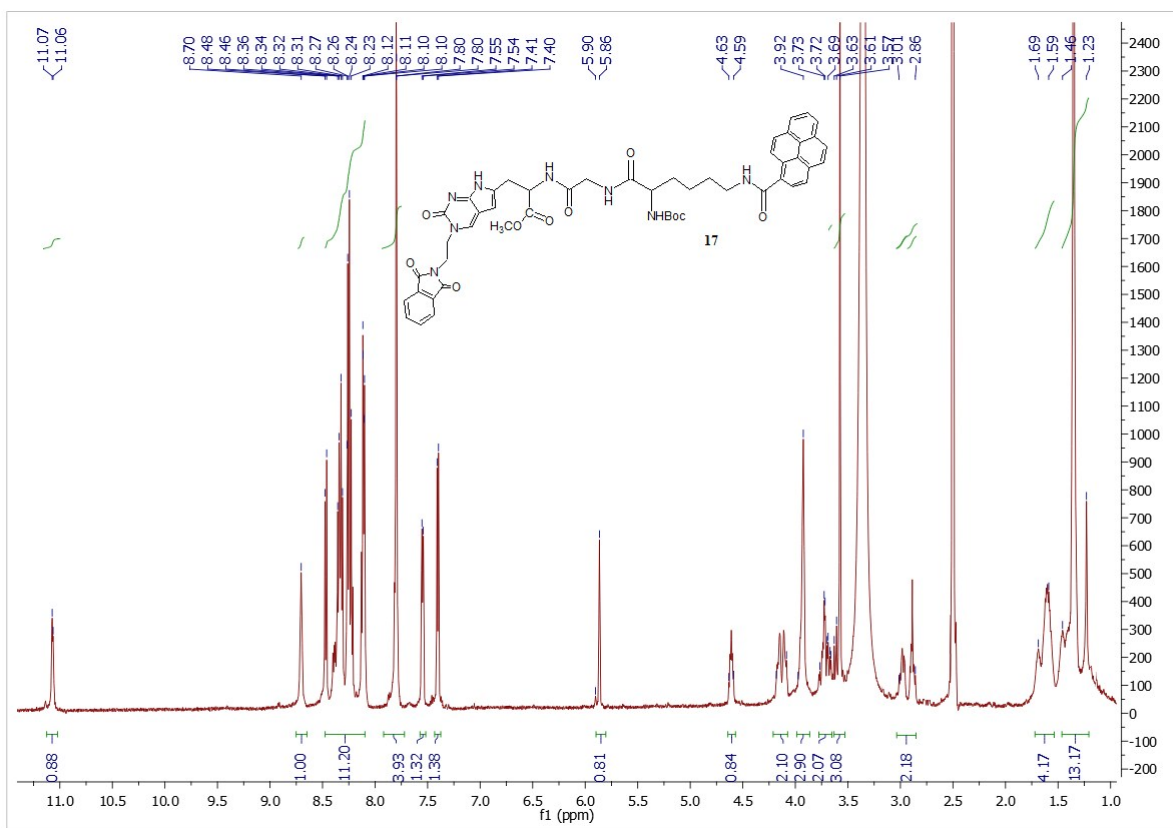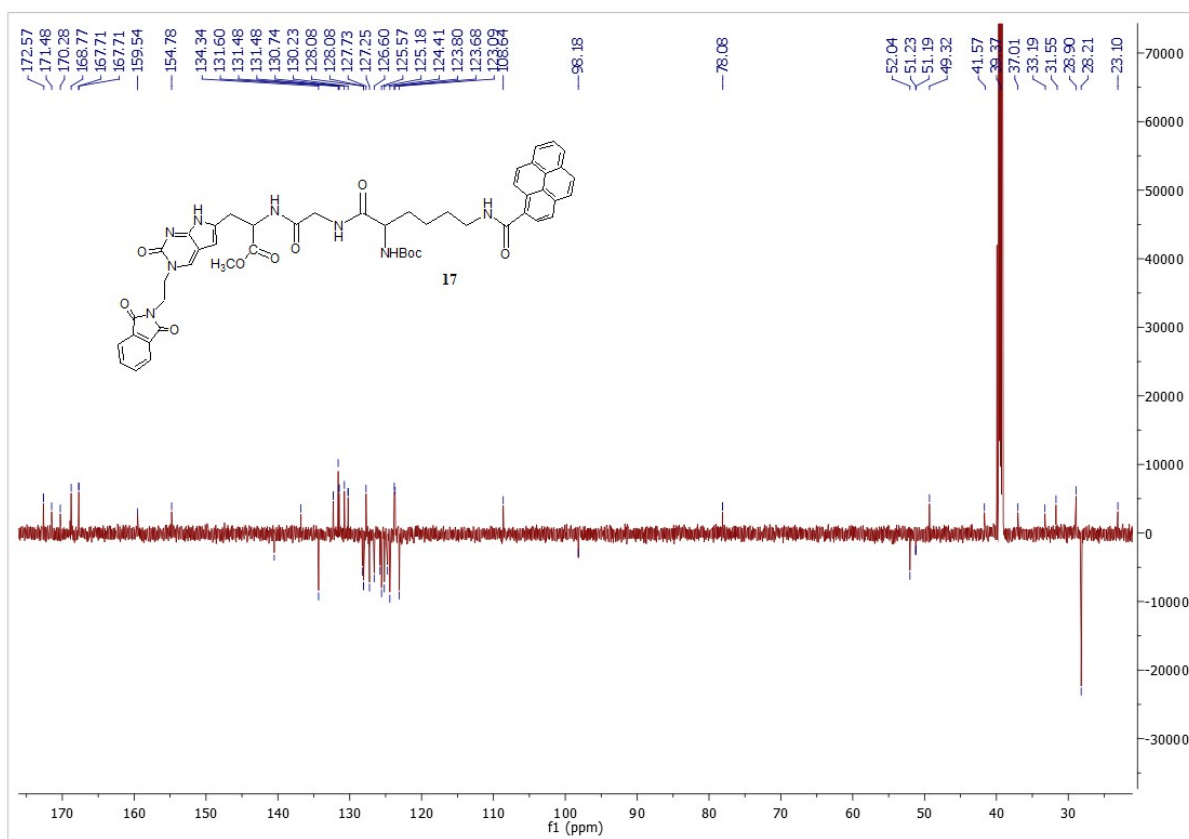

**Figure S32.** <sup>1</sup>H and <sup>13</sup>C NMR spectra of compound 17 in DMSO.



## REFERENCES

---

- <sup>1</sup> Cantor, C. R., and Schimmel, P. R. (1980) *Biophysical Chemistry*, Vol. 3, , WH Freeman and Co., San Francisco.; Egly, M., and Saenger, W. (1983) *Principles of Nucleic Acid Structure*, Springer-Verlag, New York
- <sup>2</sup> Rodger A., Norden B., In *Circular Dichroism and Linear Dichroism*; Oxford University Press: New York, 1997, Chapter 2.
